# Supplementary material for: Analysis of Recombinant Characteristics Based on 949 PRRSV-2 Genomic Sequences Obtained from 1991 to 2021 Shows That Viral Multiplication Ability Contributes to Dominant Recombination
Source: PubMed Central journal article supplement (PMC9602502; doi:10.1128/spectrum.02934-22), 2022-09-08
Supplement: spectrum.02934-22-s0001.pdf [file spectrum.02934-22-s0001.pdf]

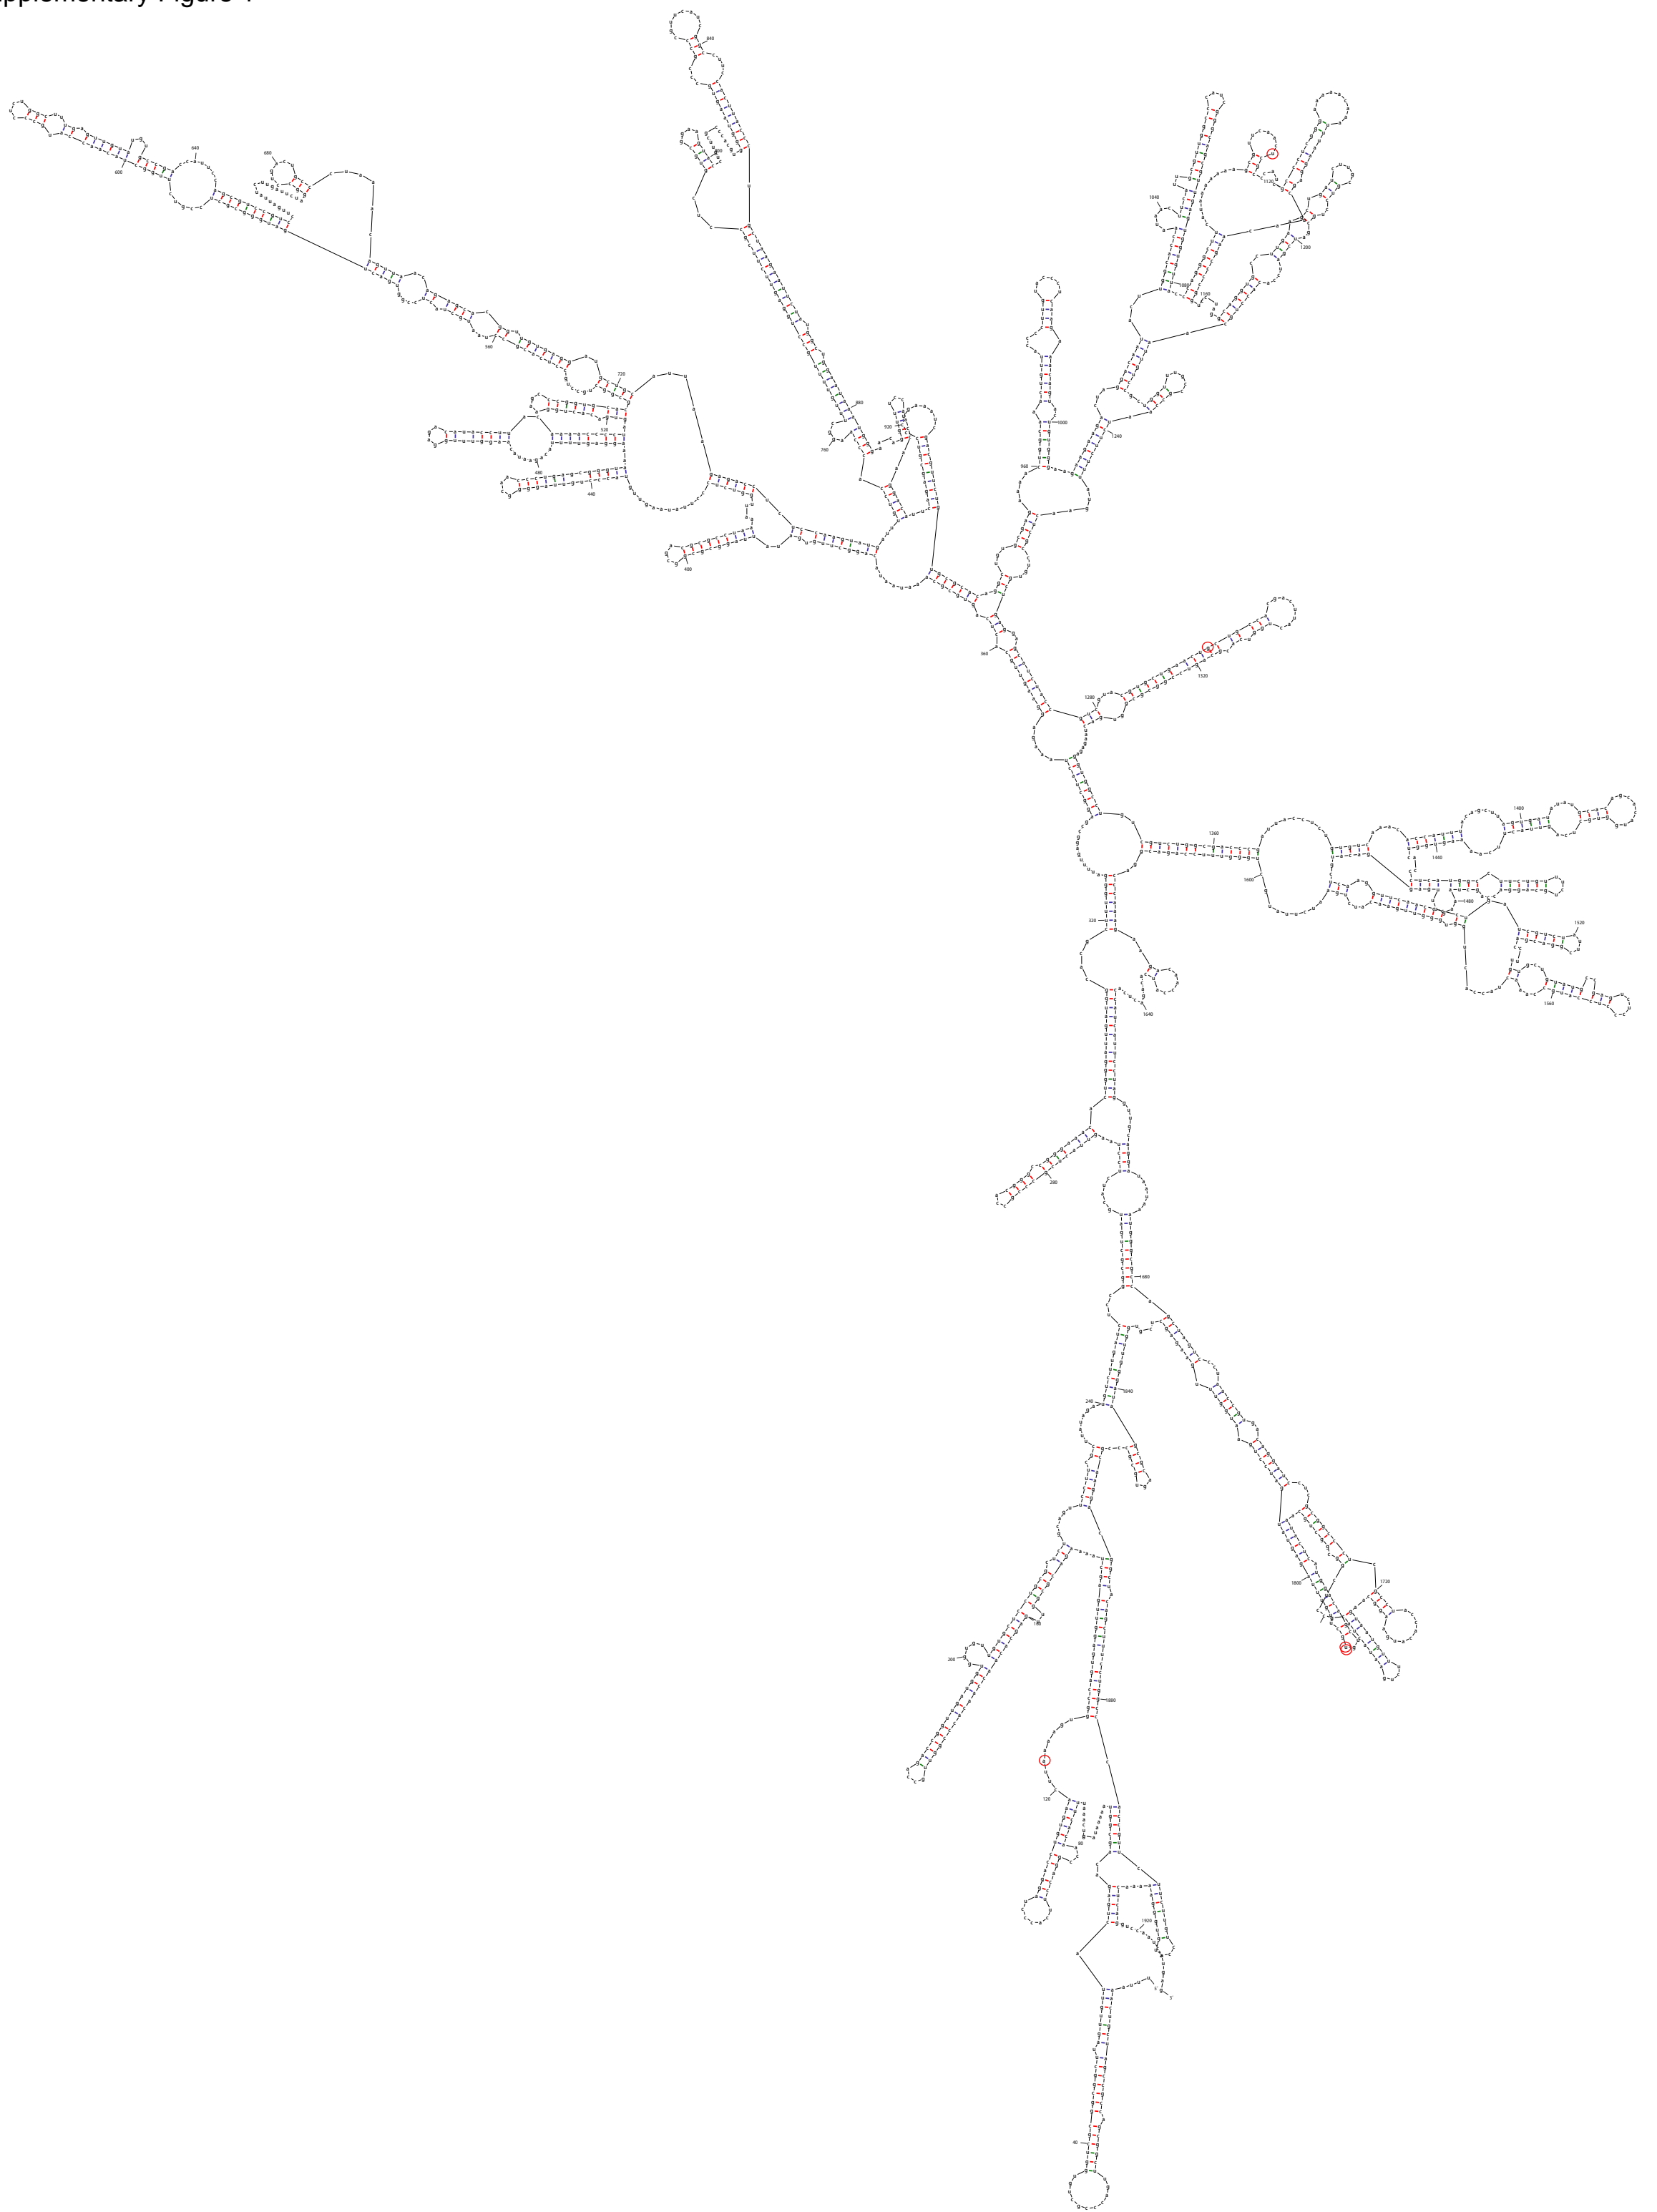

$dG = -630.68$  [Initially -700.00] JXA1 NSP9

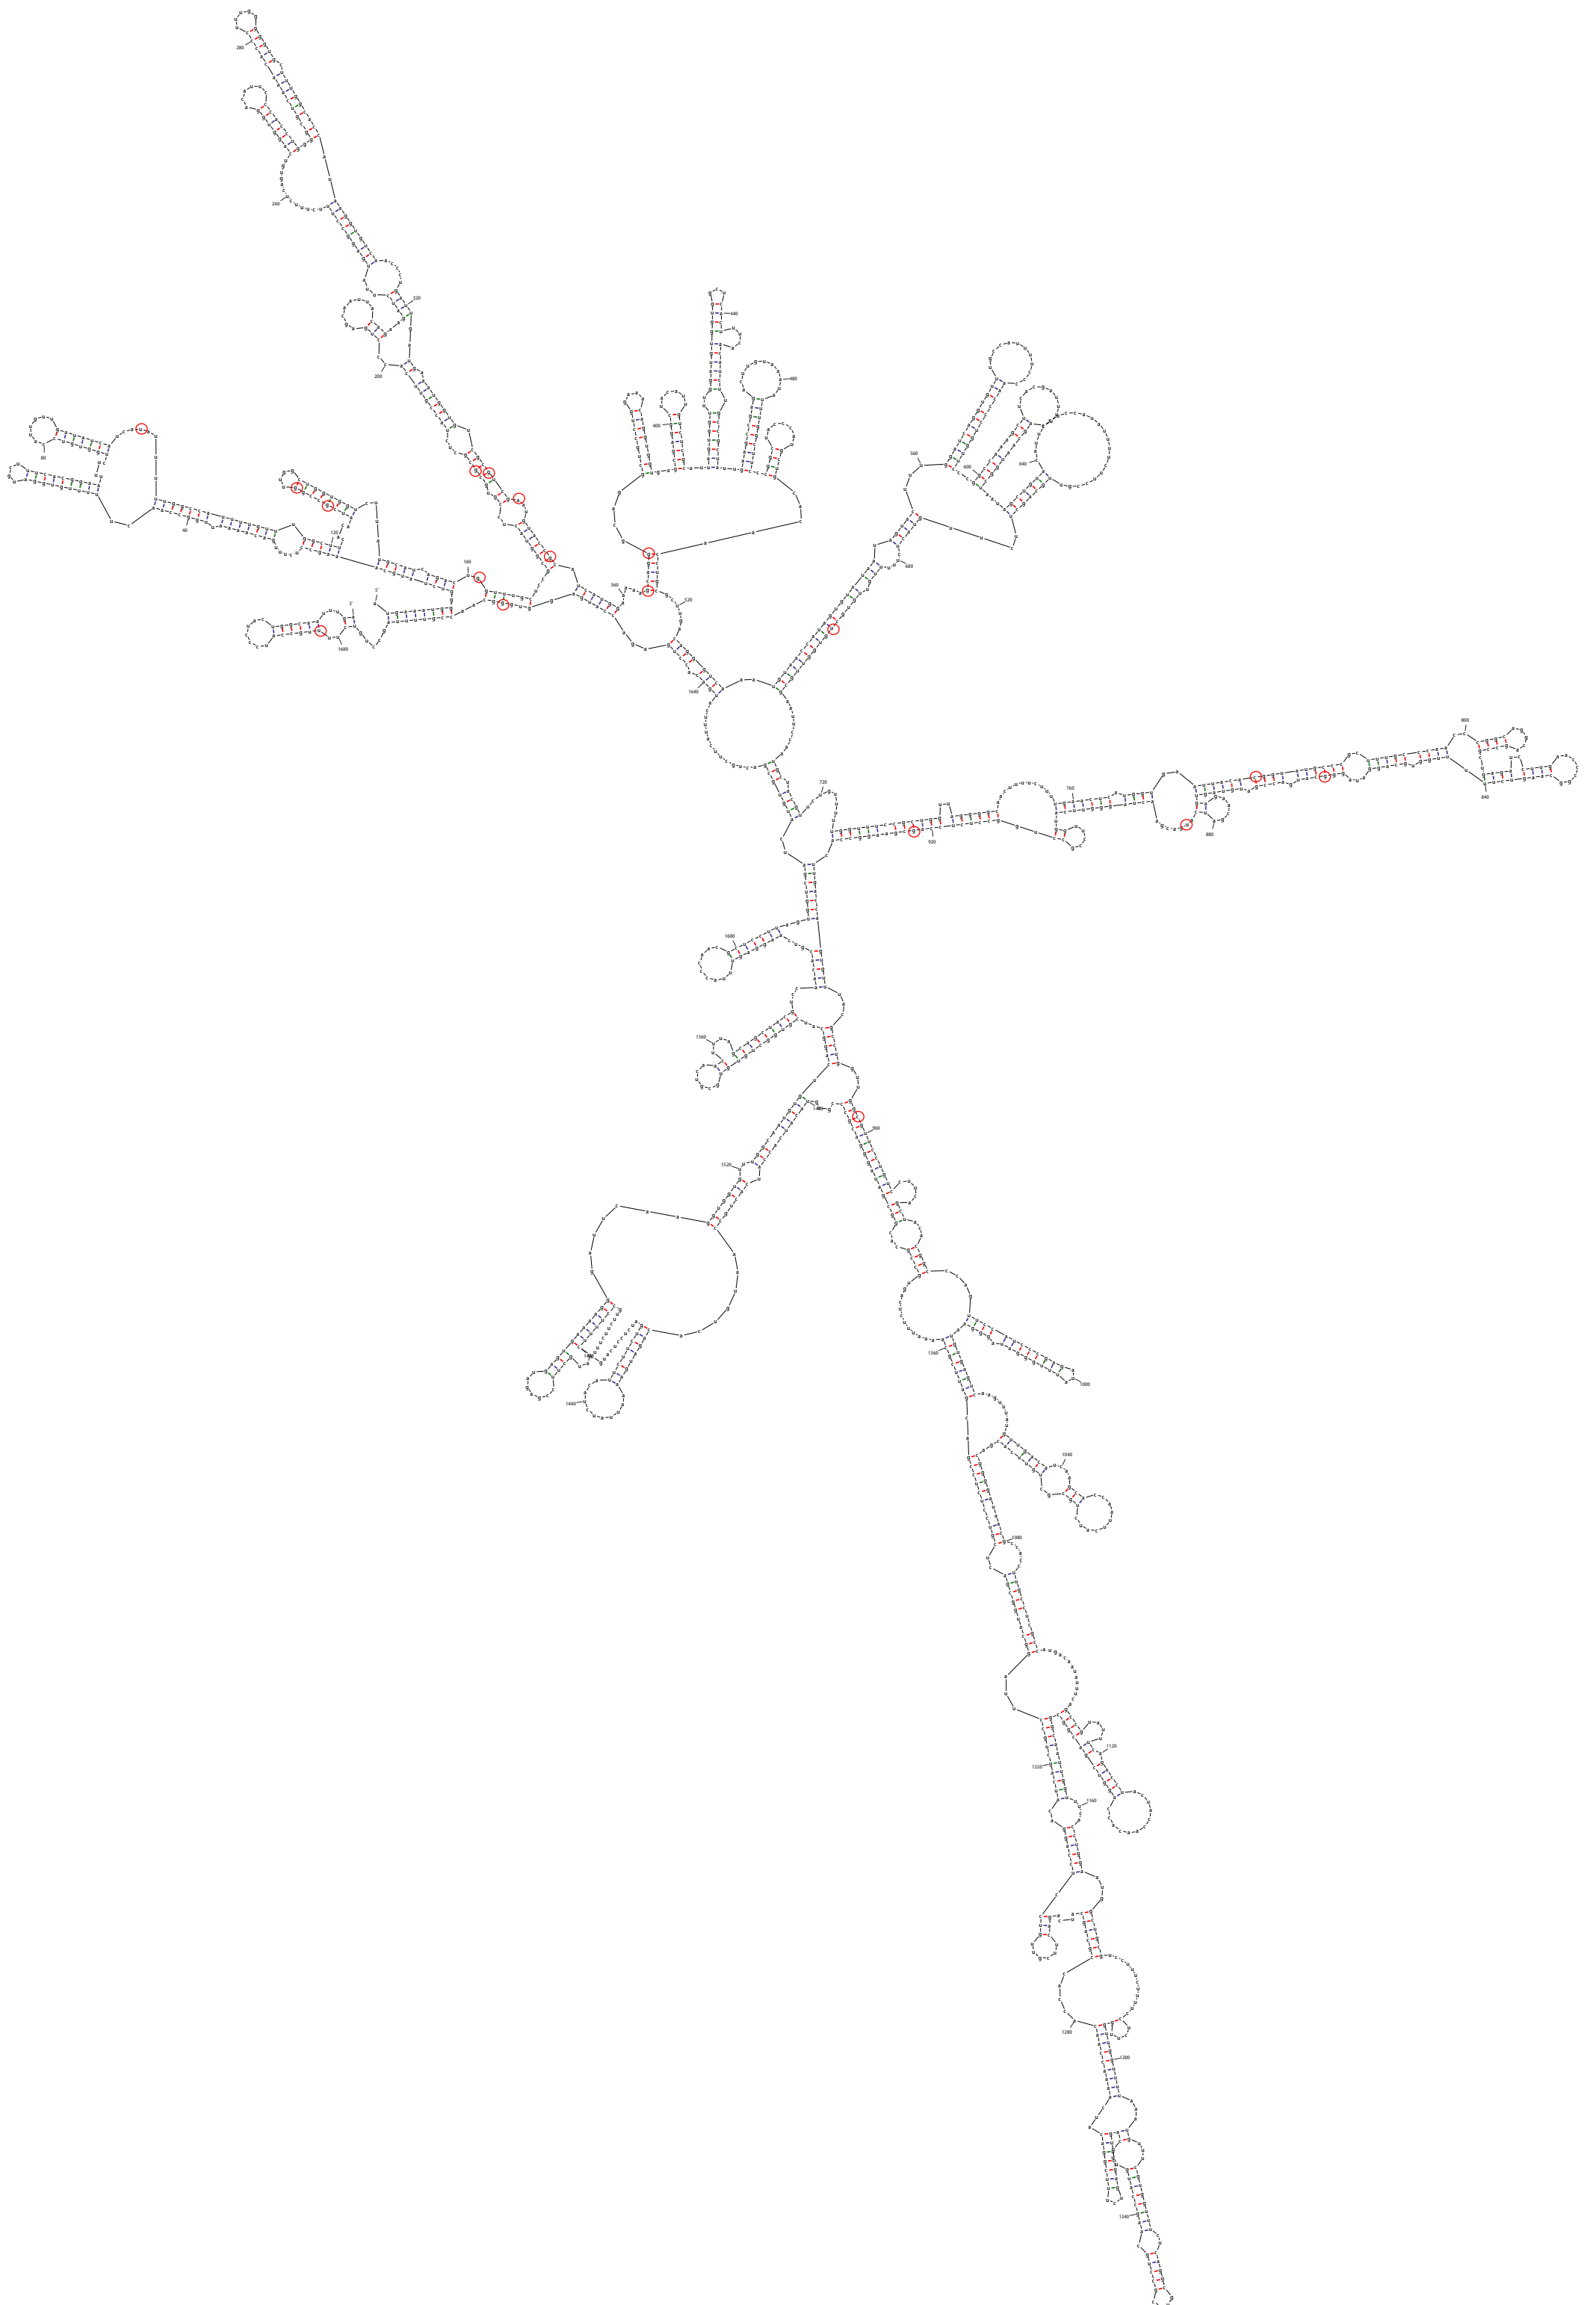

$dG = -516.49$  [Initially  $-585.20$ ] JXA1 ORF2-ORF4

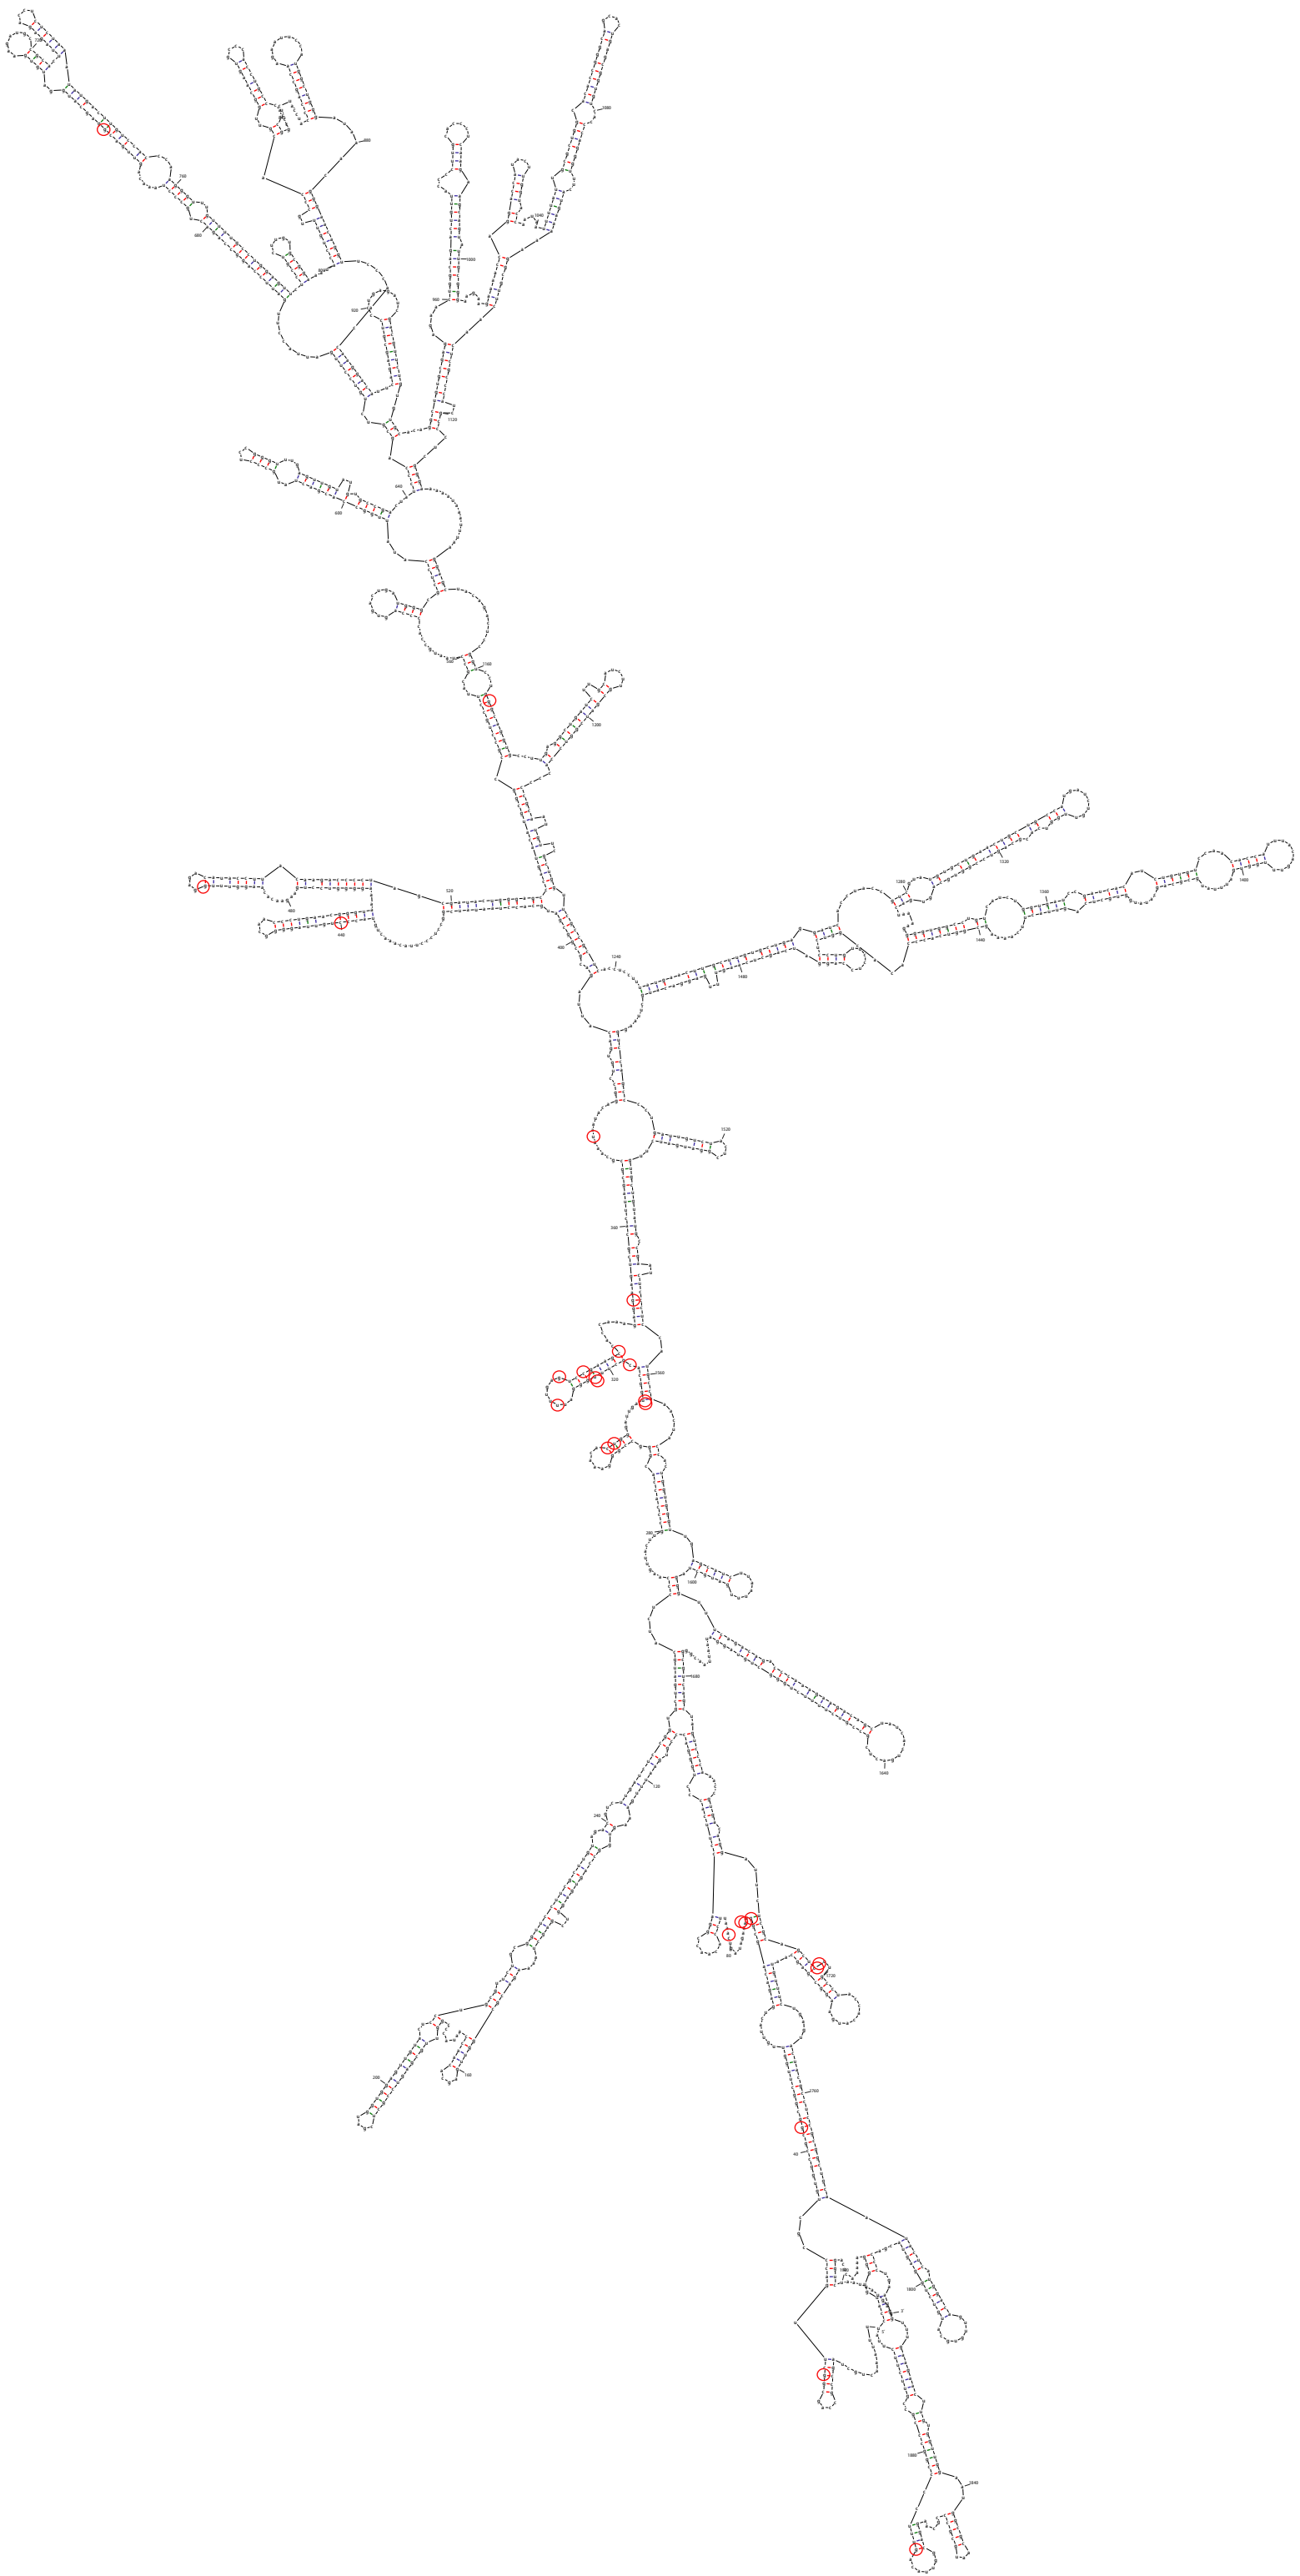

$dG = -629.06$  [Initially  $-707.50$ ] NADC30 NSP9

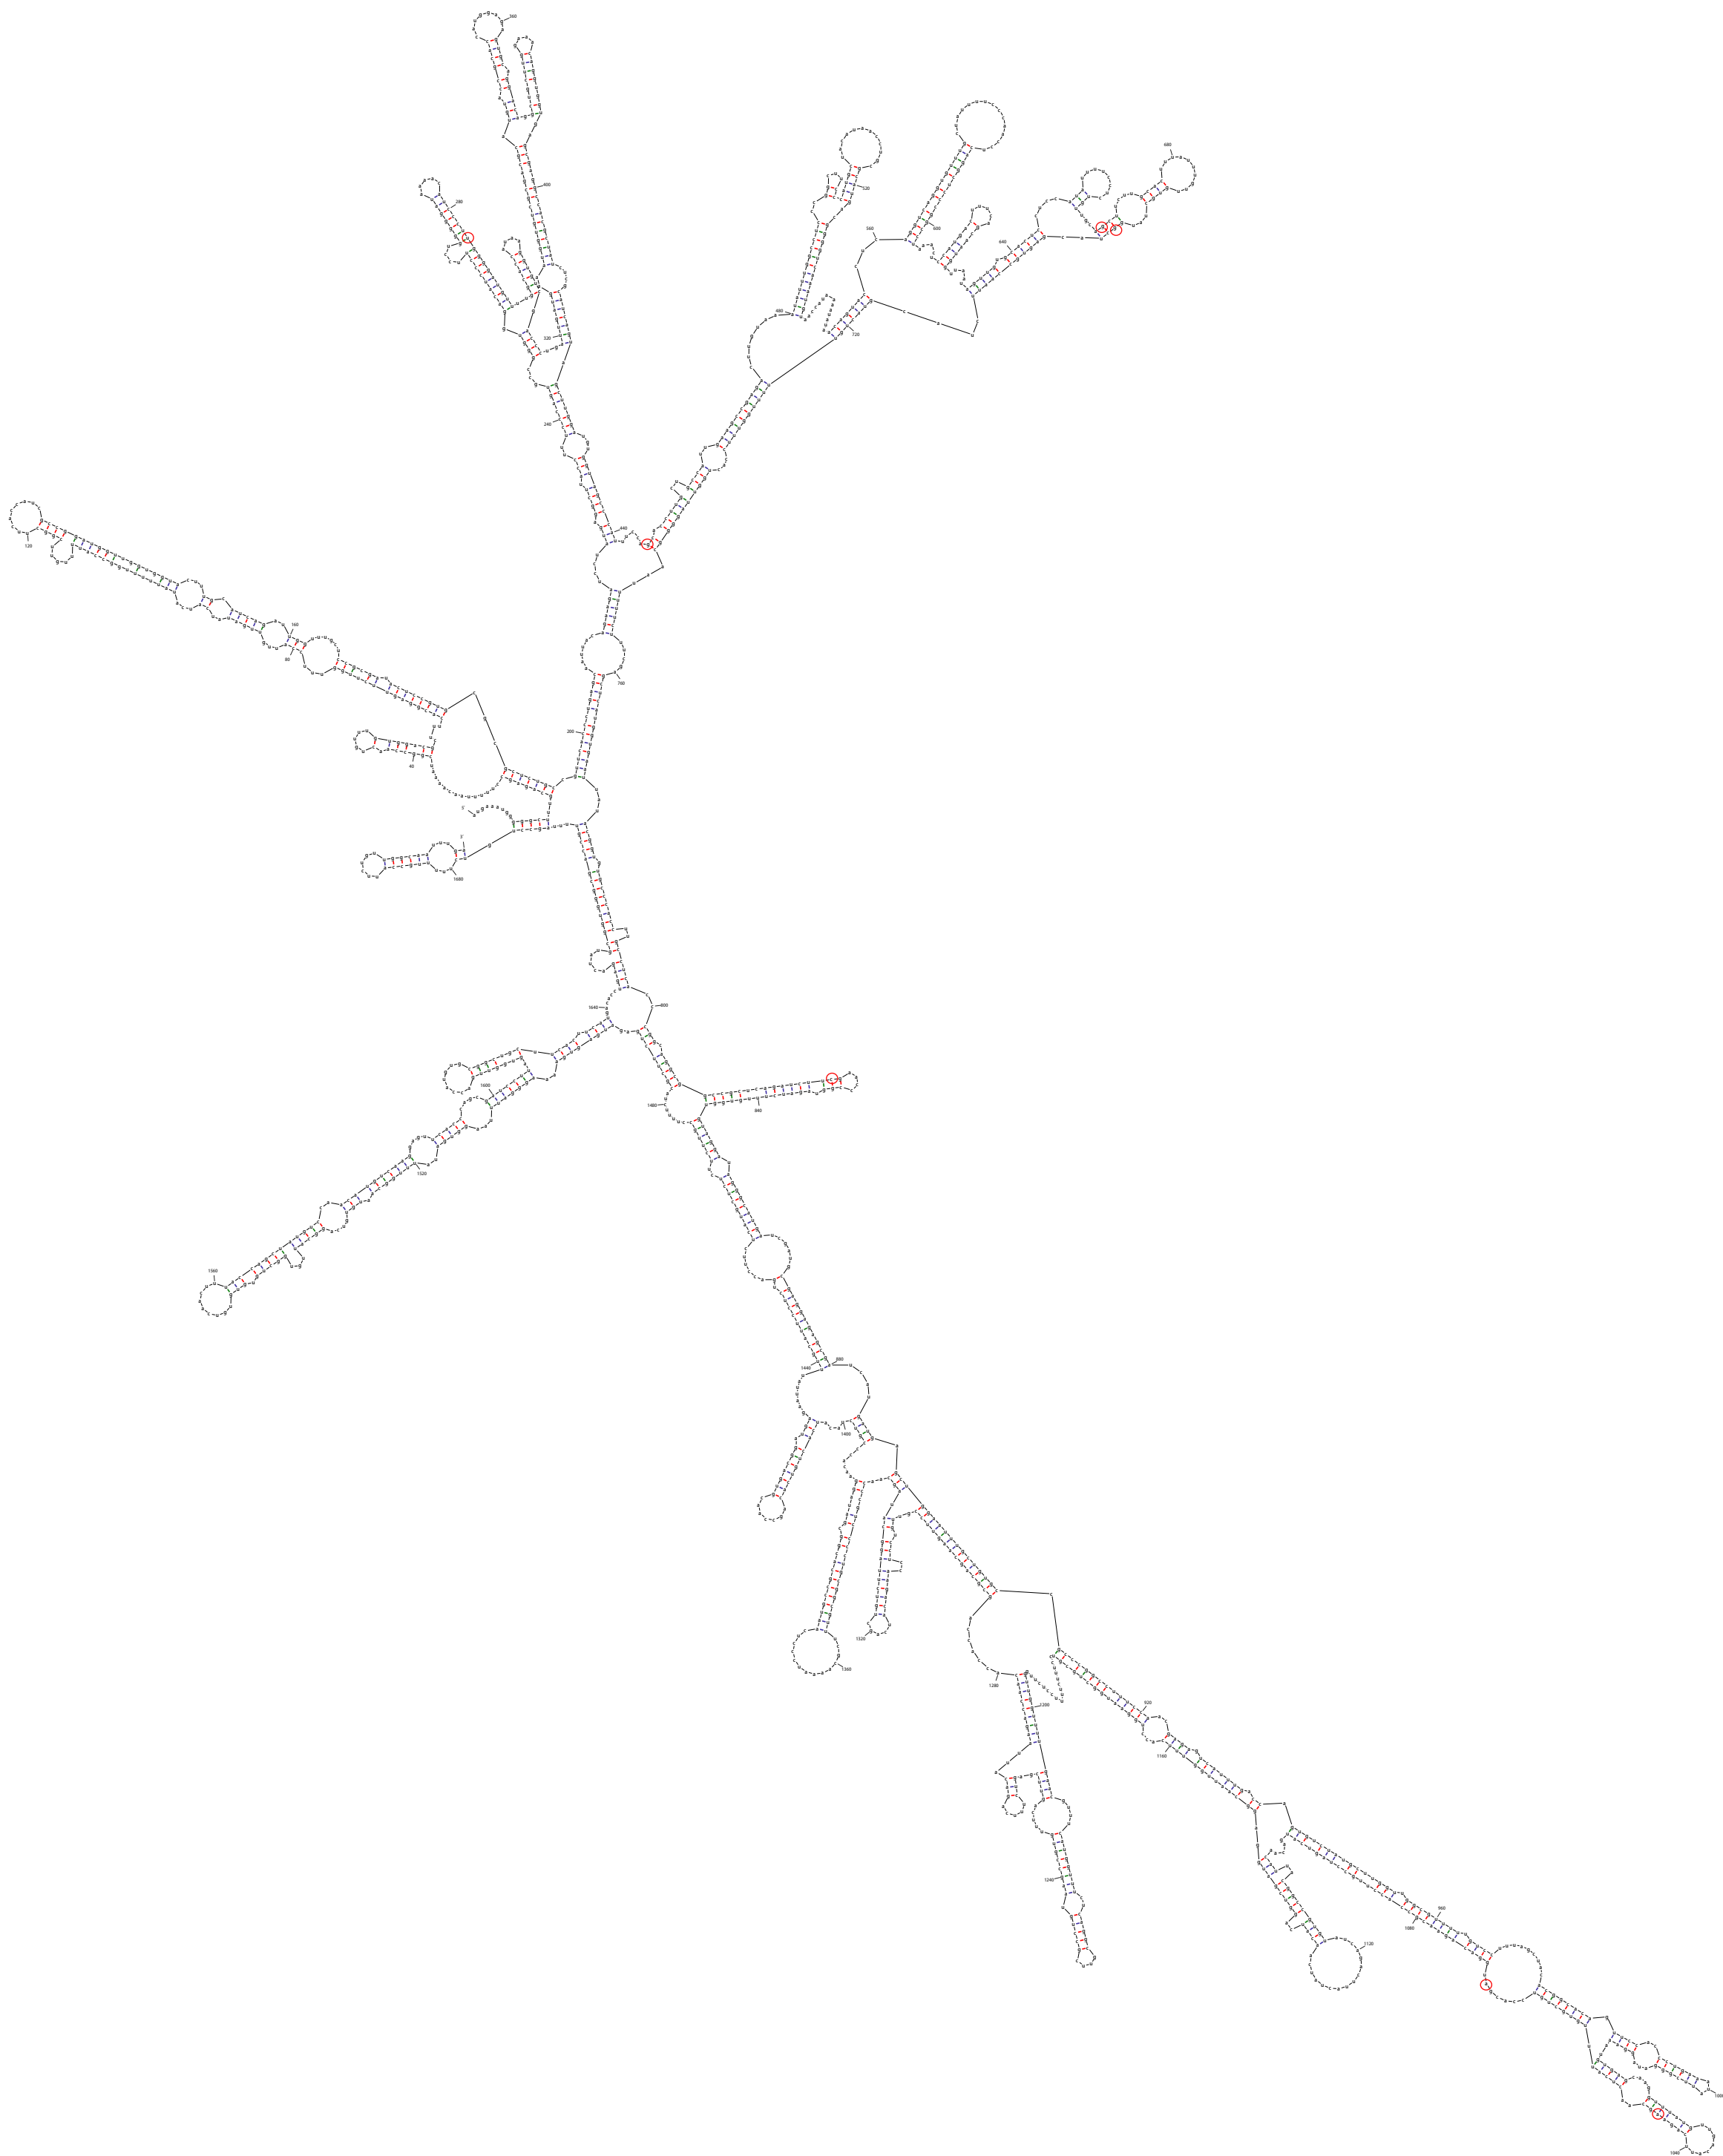

$dG = -543.50$  [Initially  $-587.00$ ] NADC30 ORF2-ORF4

Fig. S1 RNA secondary structure of the PRRSV NSP9 and ORF2–4 predicted by mfold, recombination hotspots were mapped on the secondary structure and marked by red circles.

# Supplementary Figure 2

## C101

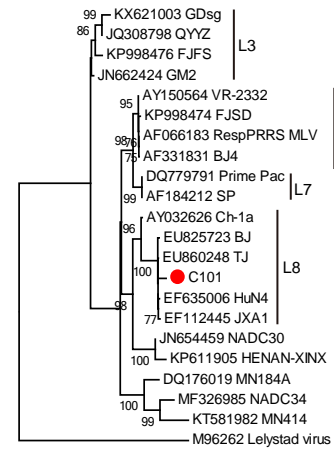

## FJDJQ-2018

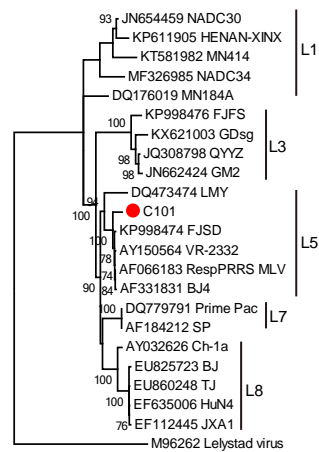

## FJDJQ-2018

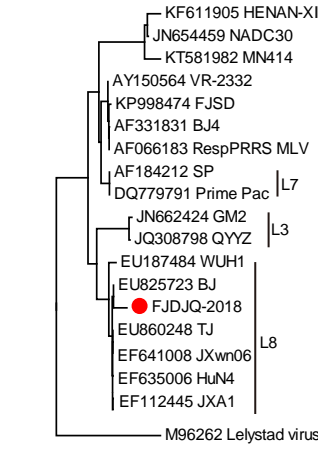

## FJDJQ-2018

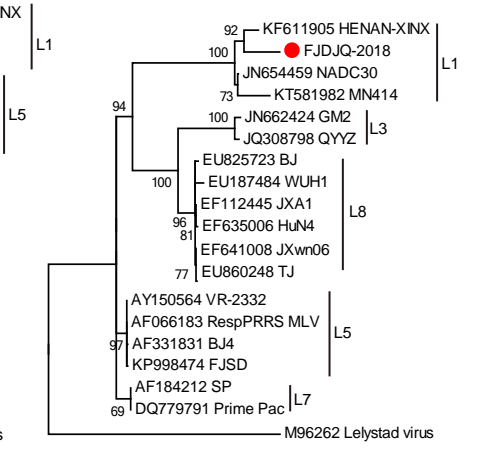

## JS1810-195

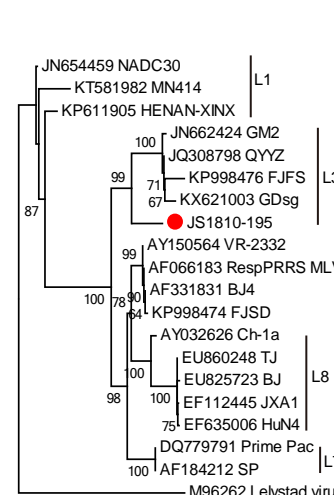

## JS1810-195

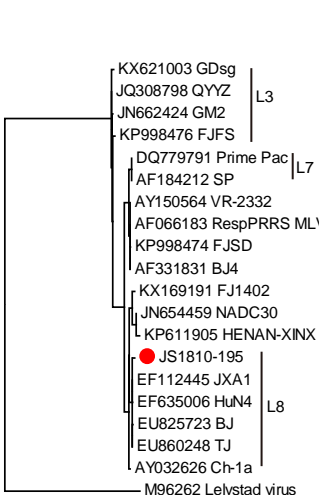

## GXNN1396

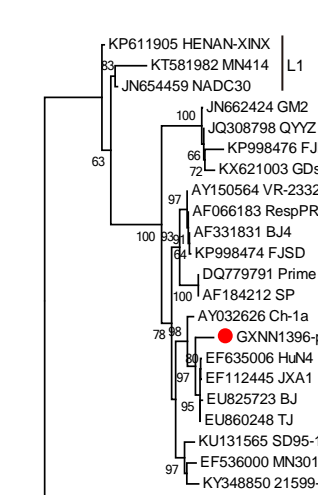

## GXNN1396

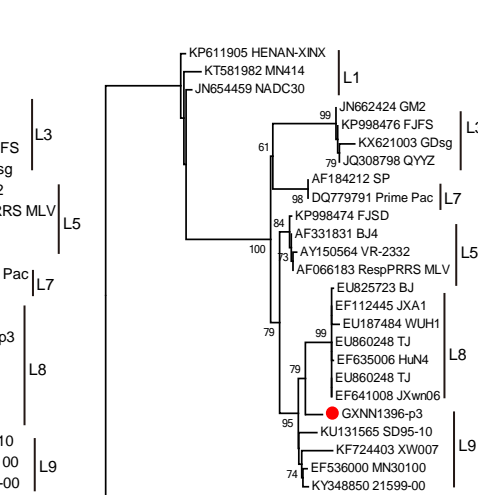

## PRRSV2/CN/GDDX/2018

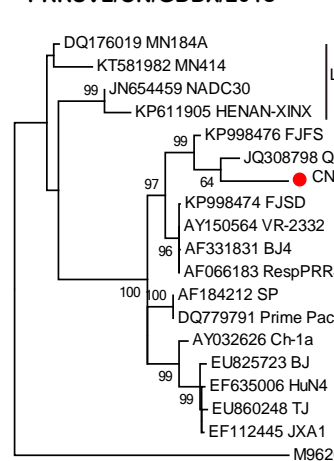

## PRRSV2/CN/GDDX/2018

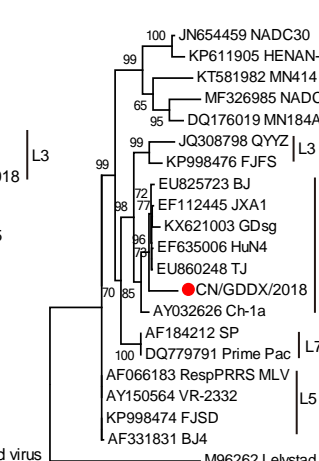

## GDSf1808

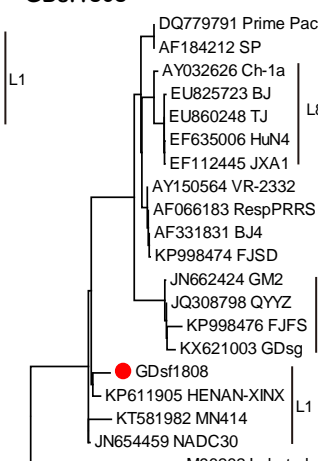

## GDSf1808

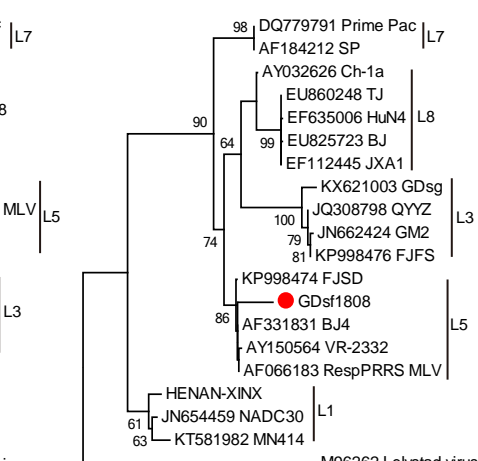

## SD43

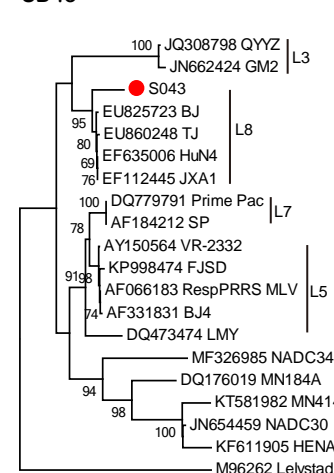

## SD43

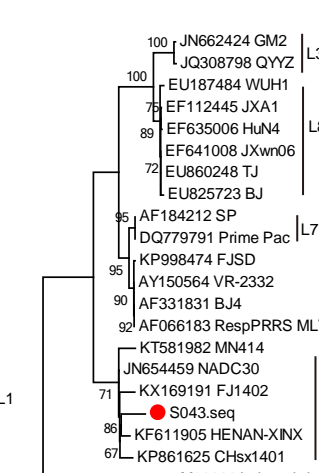

## GDHZ\_Huizhou

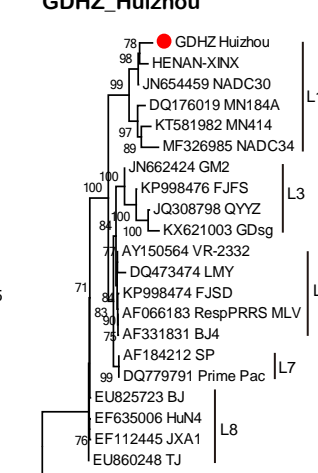

## GDHZ\_Huizhou

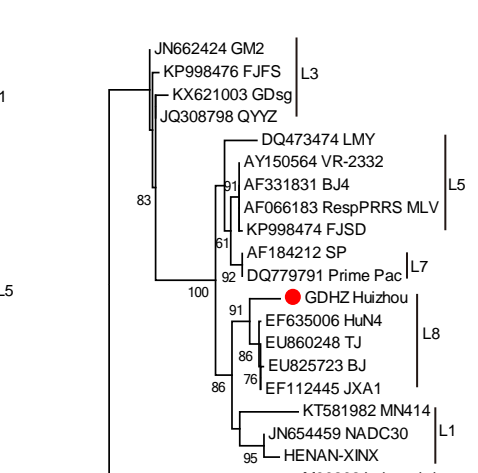

LN86

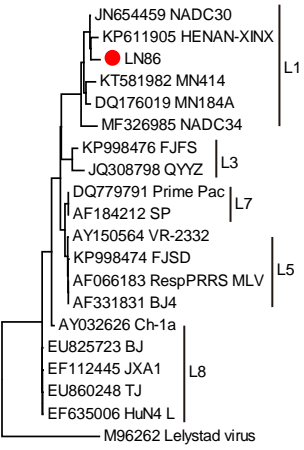

S039

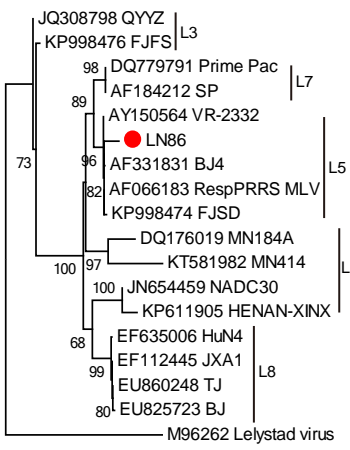

S039

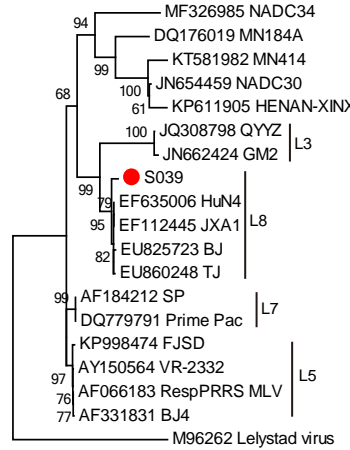

S039

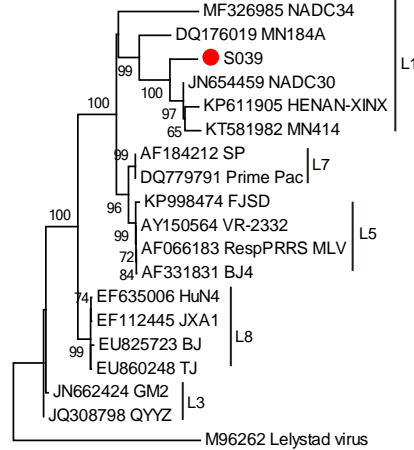

S130

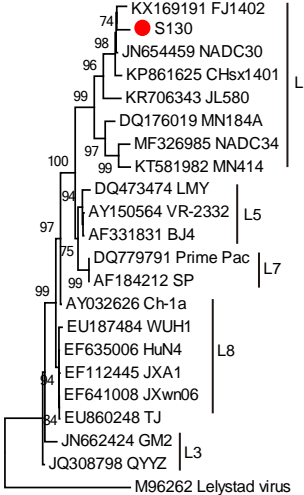

S130

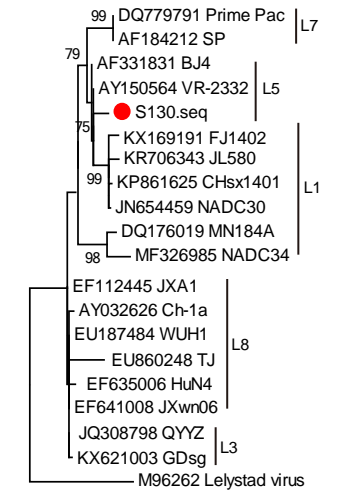

H60

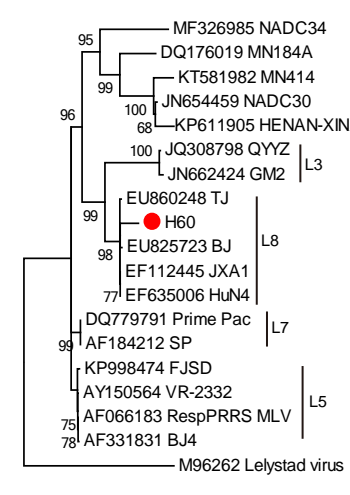

H60

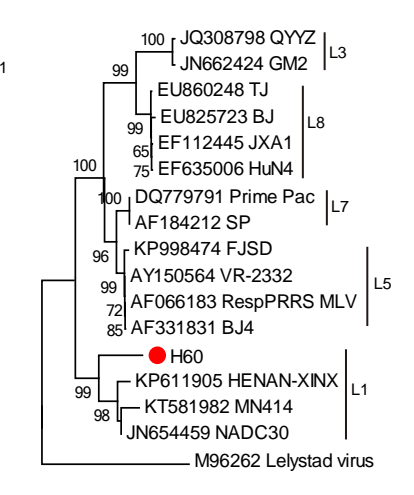

SDbz16-2

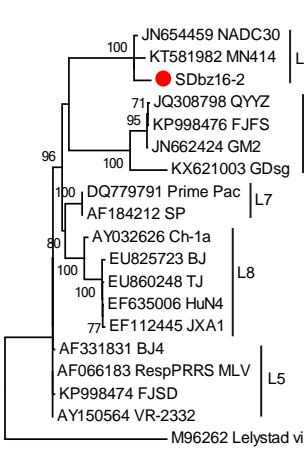

SDbz16-2

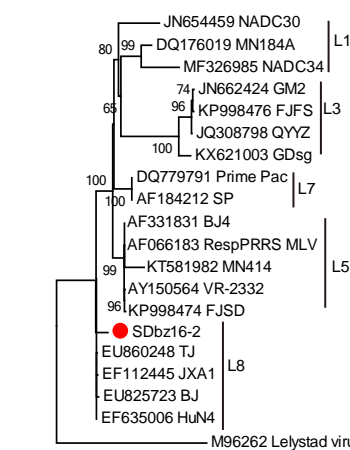

H013

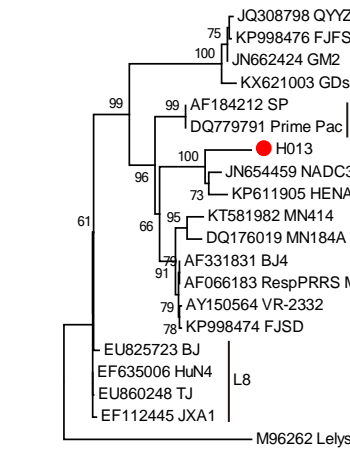

H013

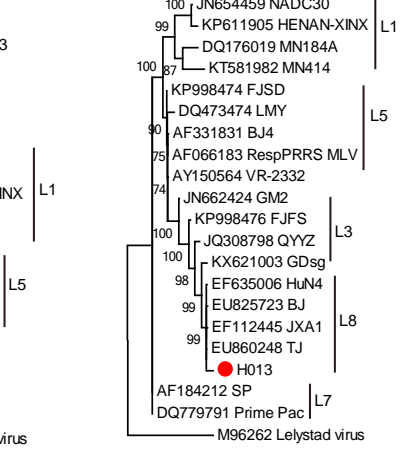

XJ1904-39

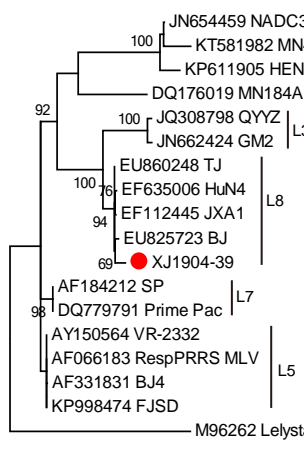

XJ1904-39

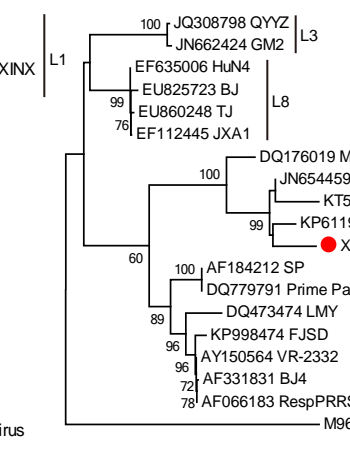

SDqd1501

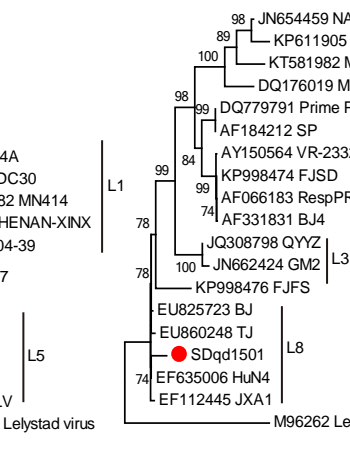

SDqd1501

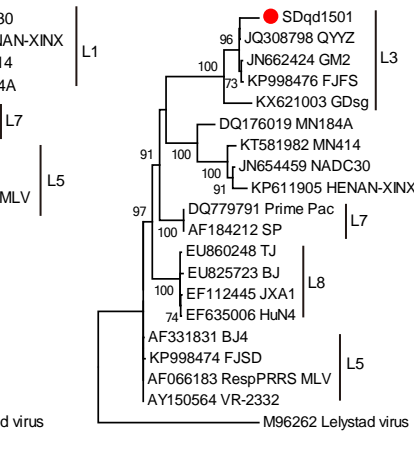



### HeN1501

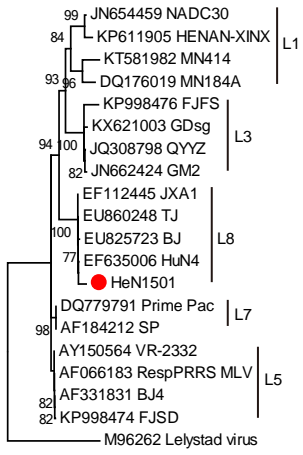

### JS18-3

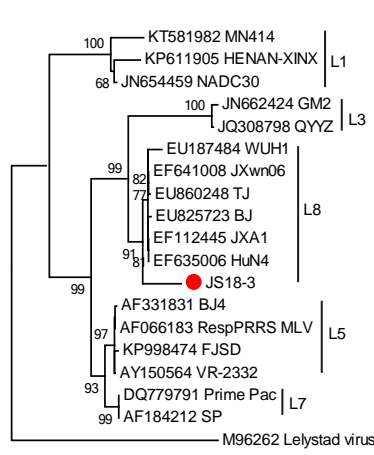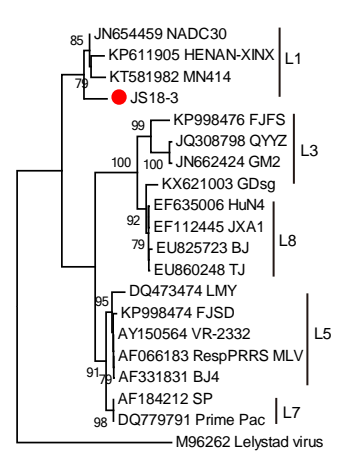

### GDsf1809

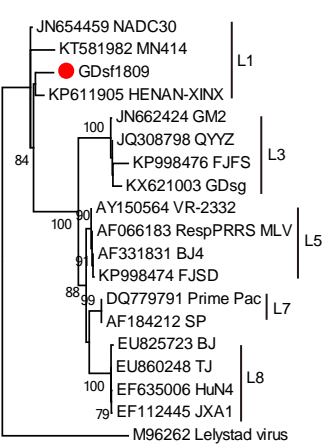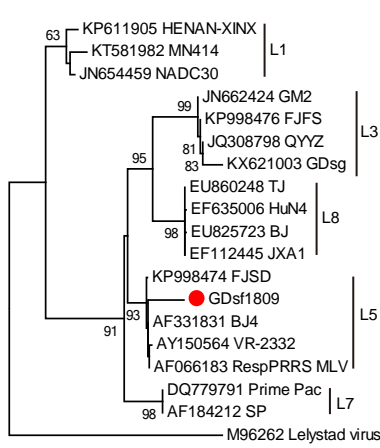

### GXNN1839

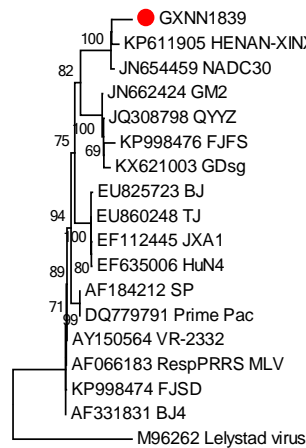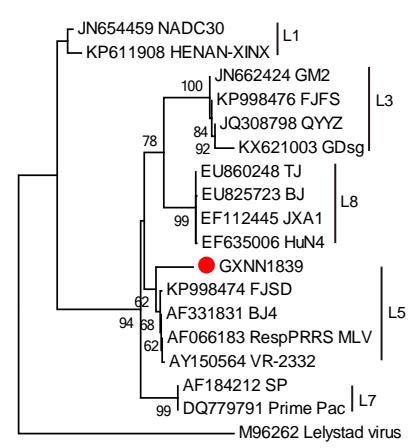

### SD110-1608

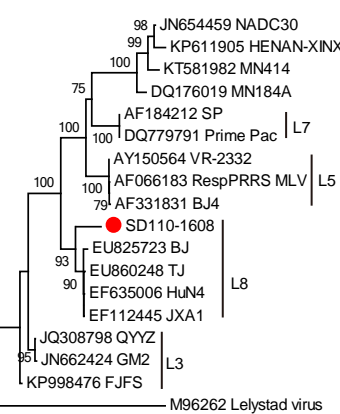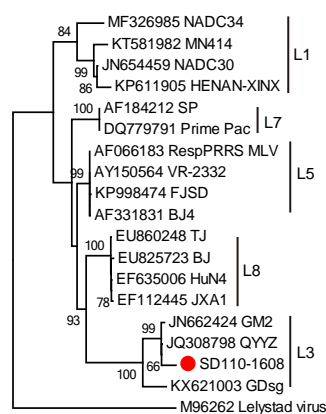

### SDwh1601

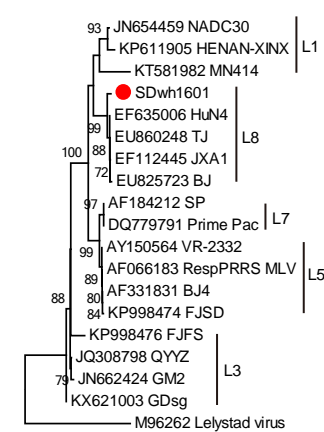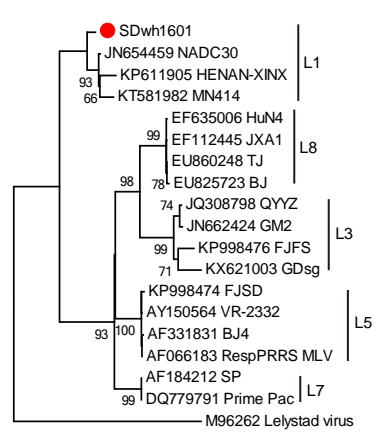

### SWU/YB2/2018

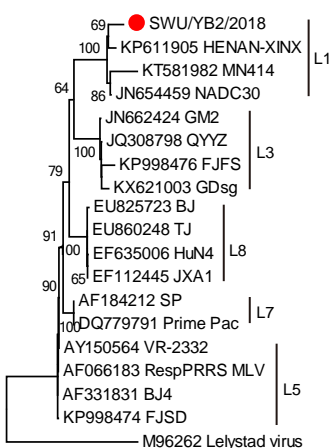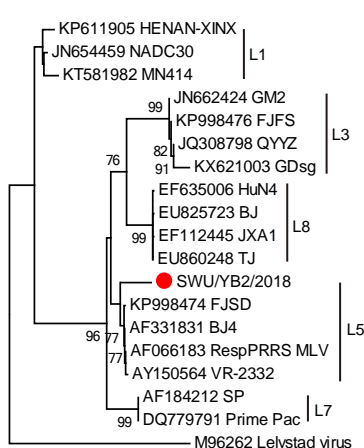

### SWU/YB1/2018

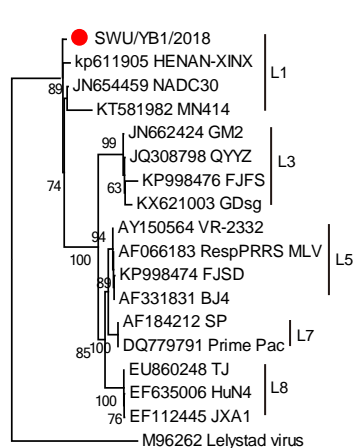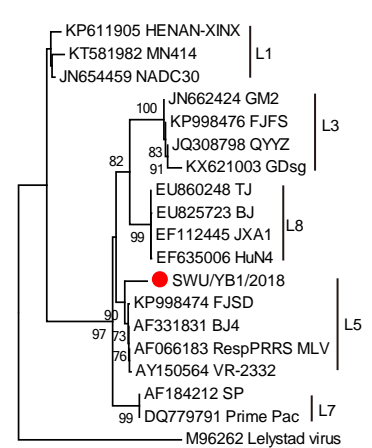



### SCya18

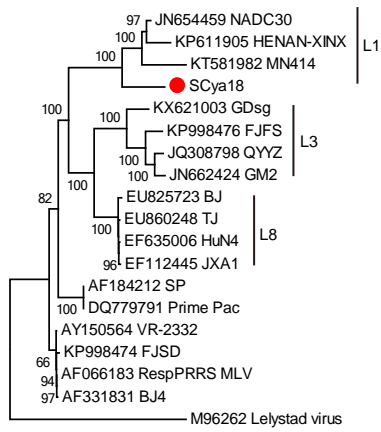

### SWU/MS2/2018

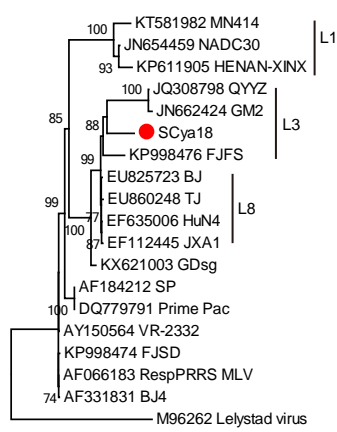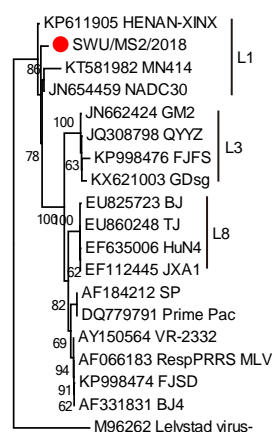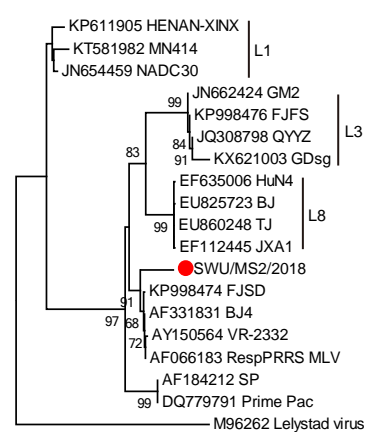

### SWU/MS3/2018

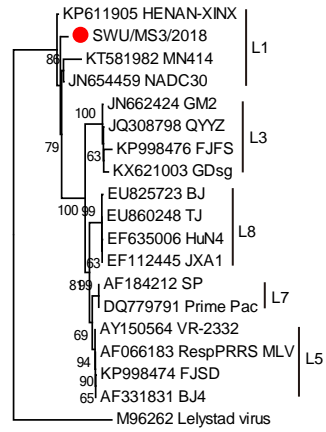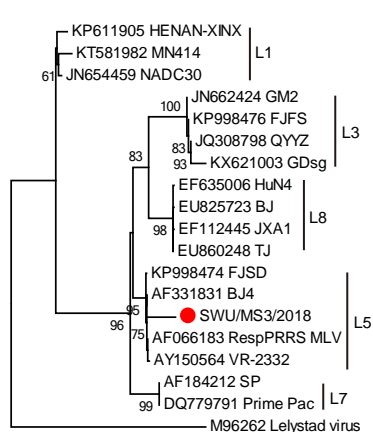

### NA80

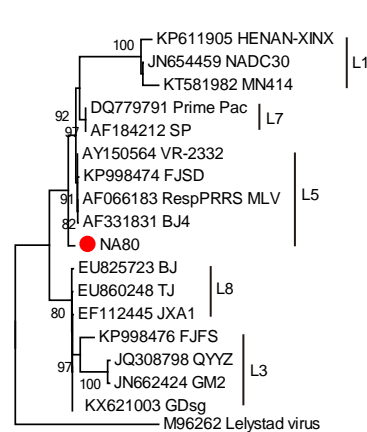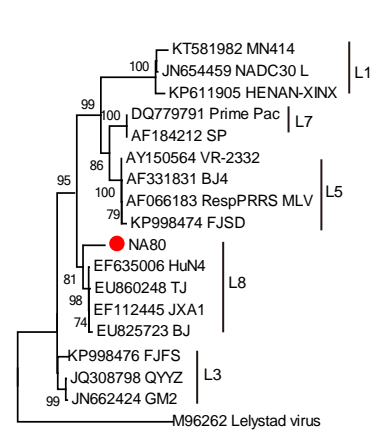

### GDQYQC2

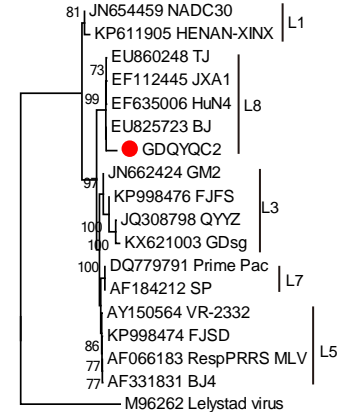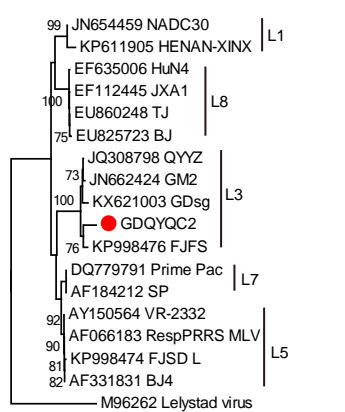

### PRRSV/CN/X2984/2018

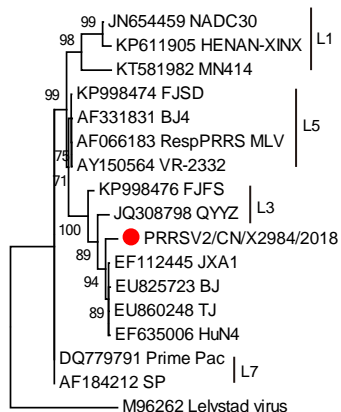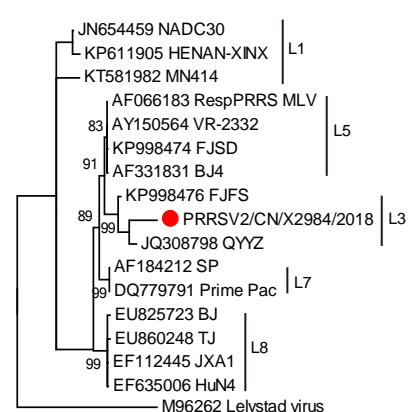

### GDsf1806

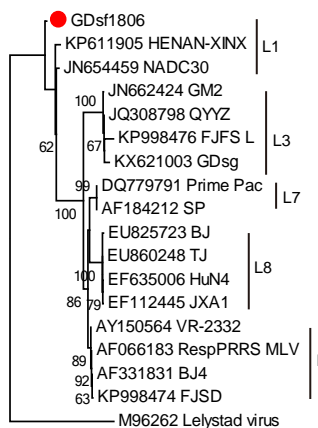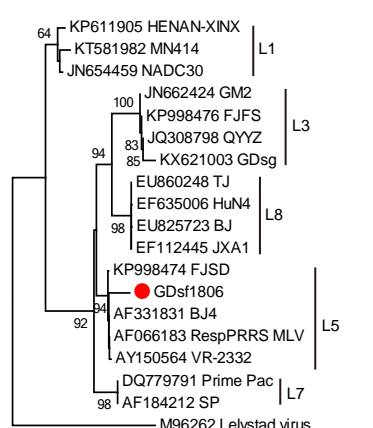

### GDsf1710

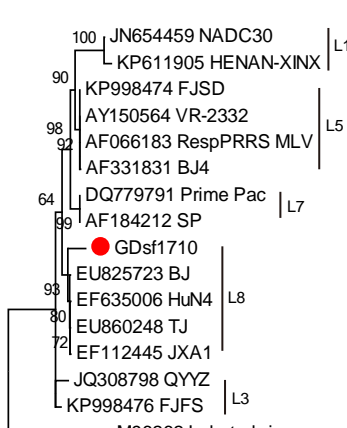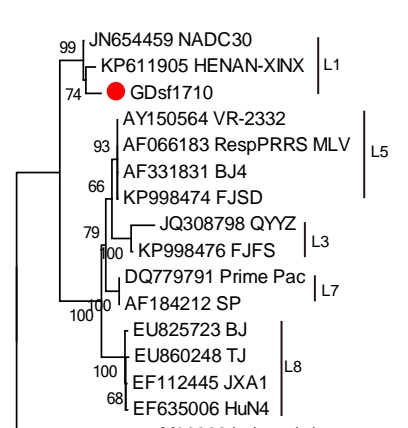

H012

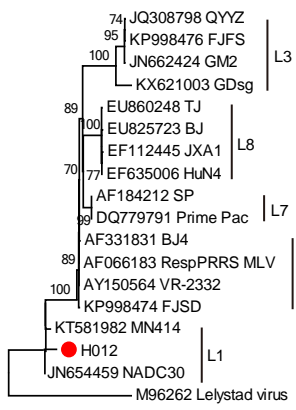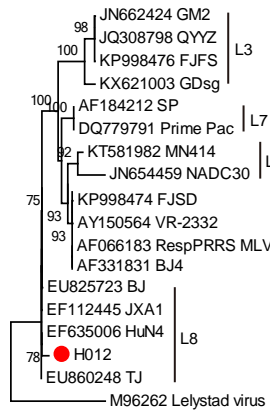

PRRSV2/CN/N9185/2018

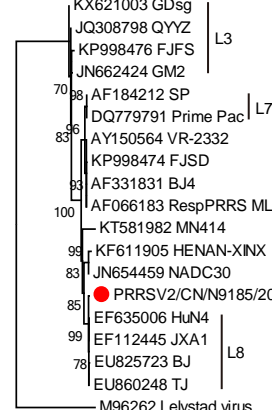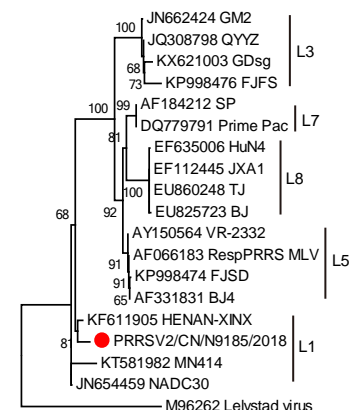

JS2020

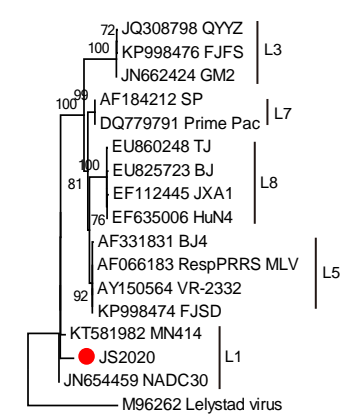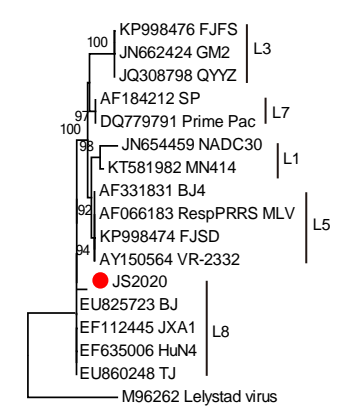

SWU/CD1/2018

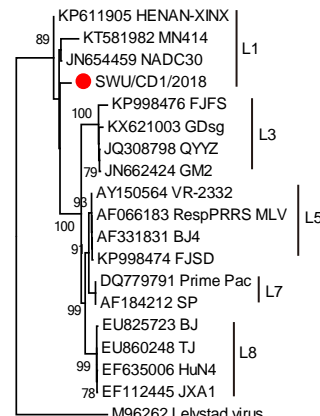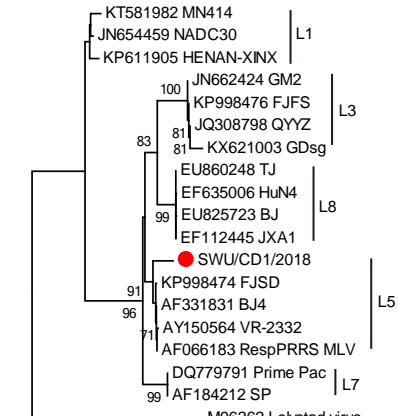

PRRSV2/MY5/2018

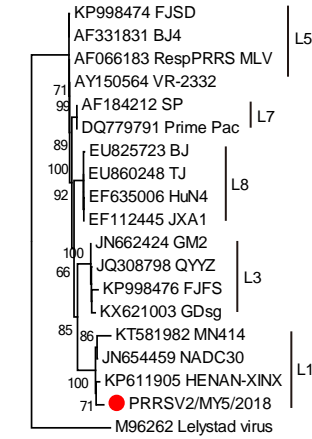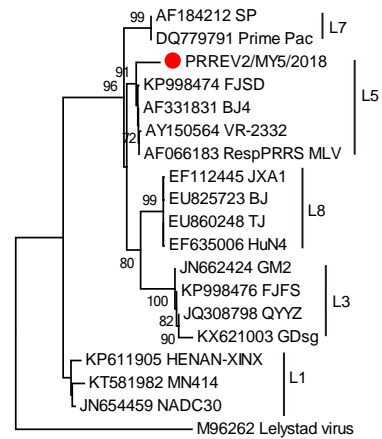

GDsf1807

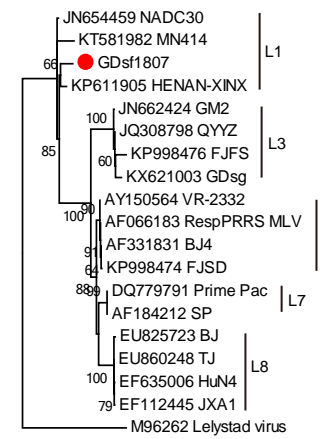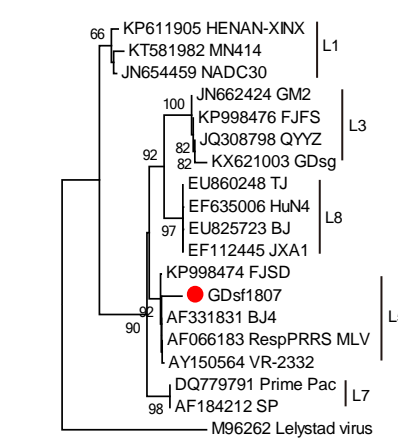

GDsf1804

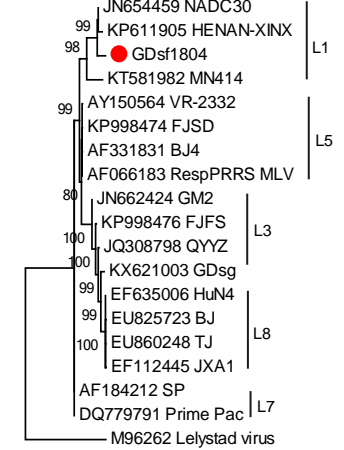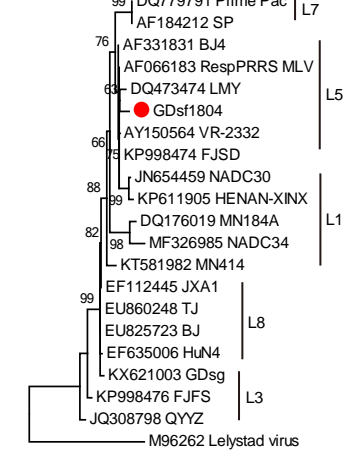

GDsf1711

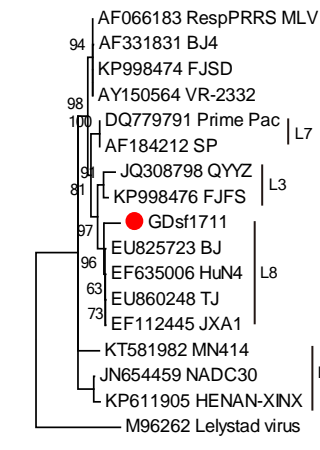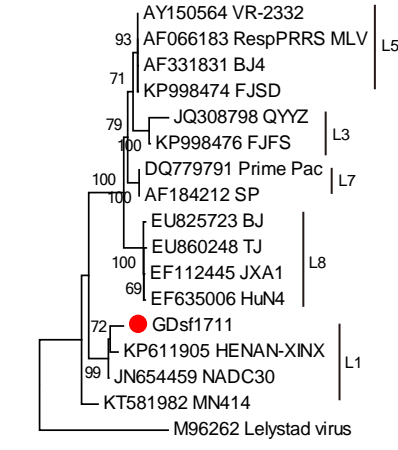

### SWU/MY6/2018

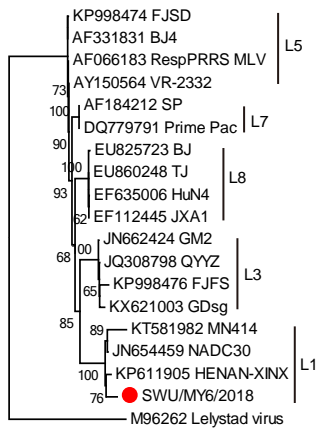

### GDSf1802

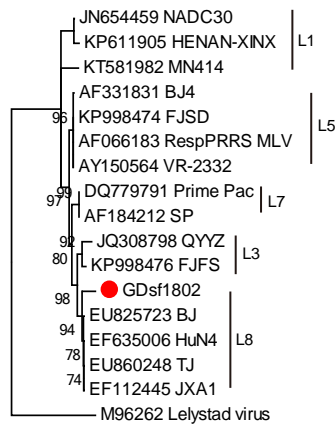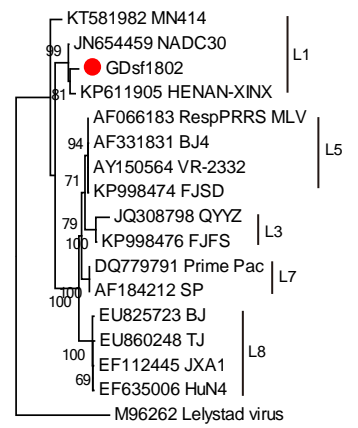

### GDSf1707

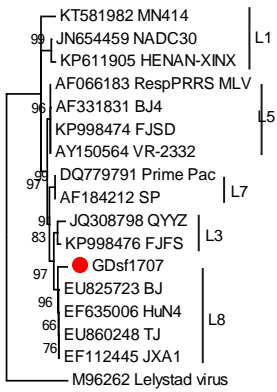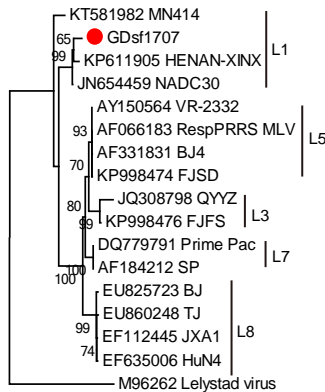

### PRRSV2/CNF/1228/2017

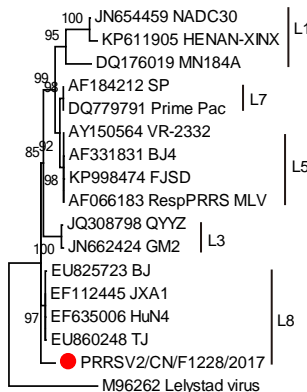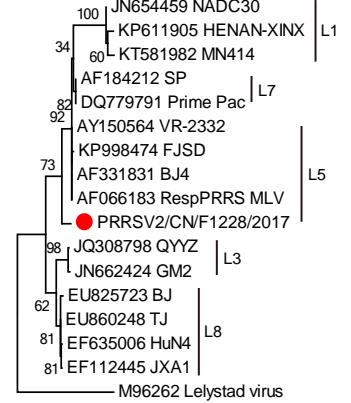

### SDyt1401

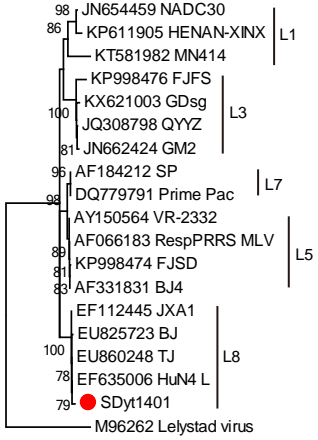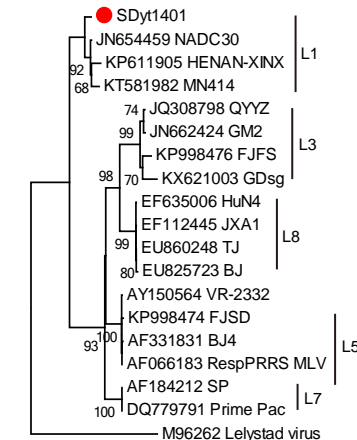

### GDhh1808

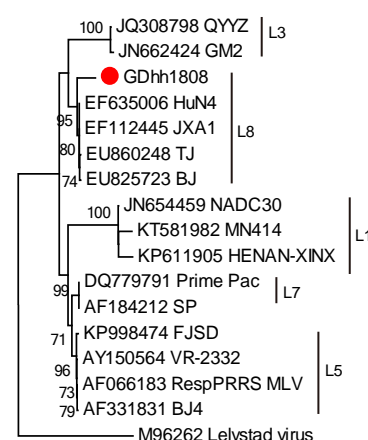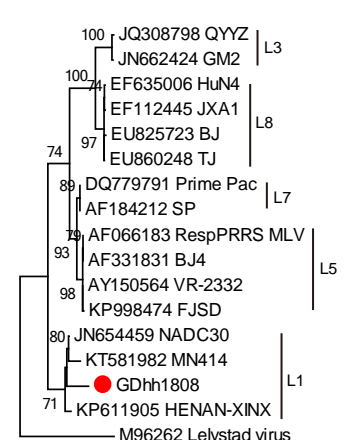

### PRRSV2/CN/X9830/2018

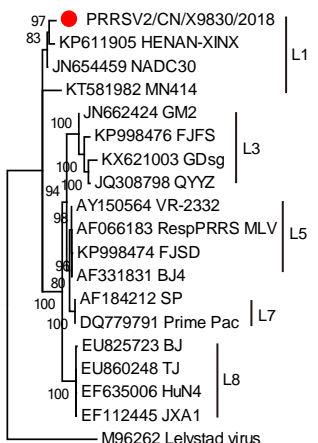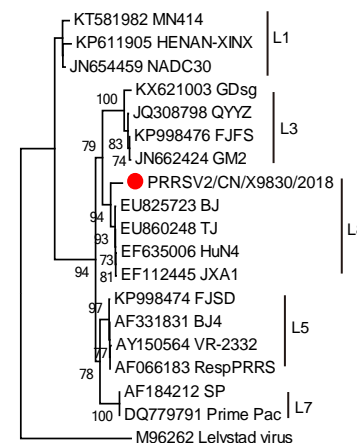

### PRRSV/CN/X4836/2018

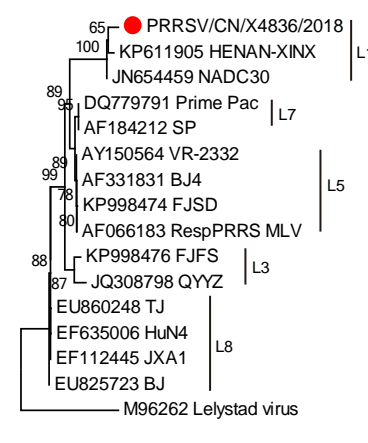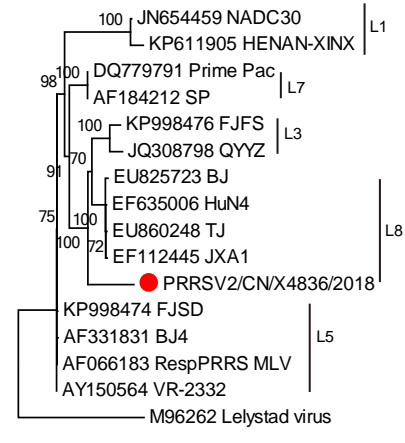



GDsc1809

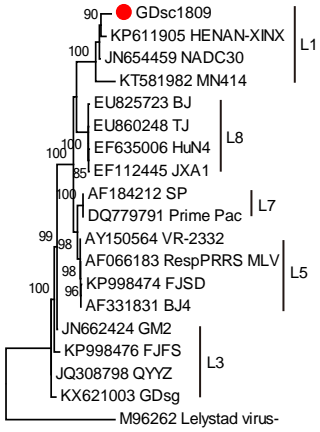

PRRSV2/CN/X4833/2018

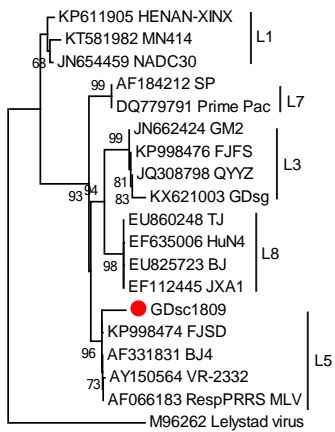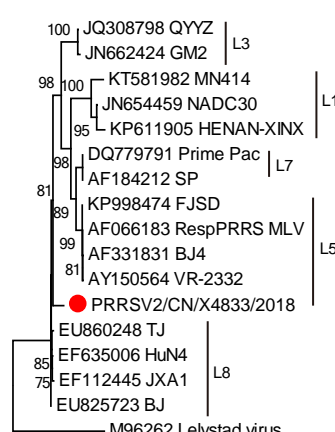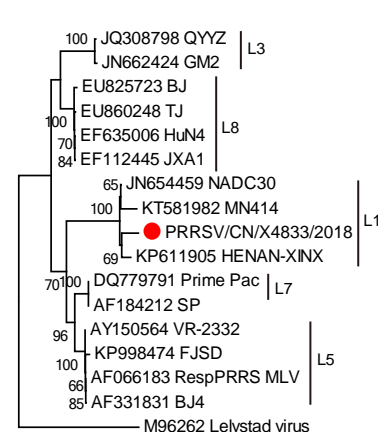

GXNN202004a

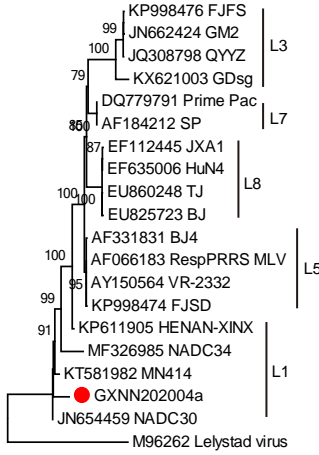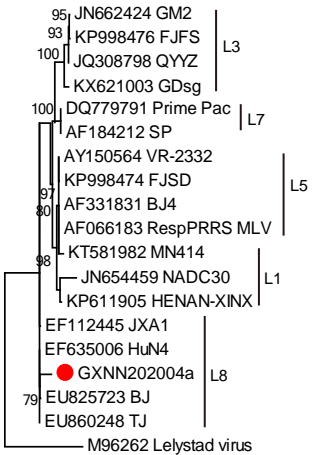

GXNN202004

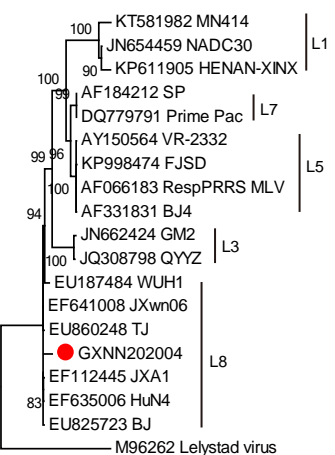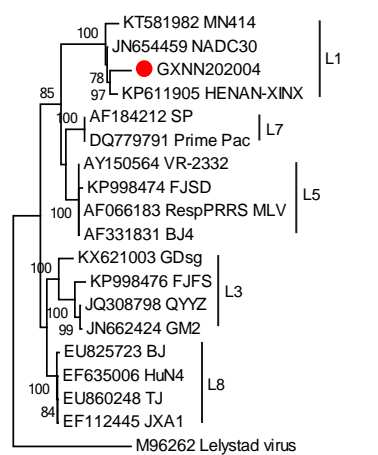

PRRSV2/CN/X4839/2017

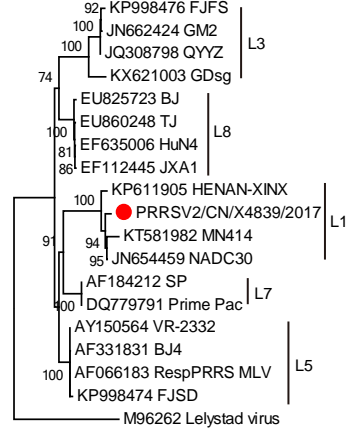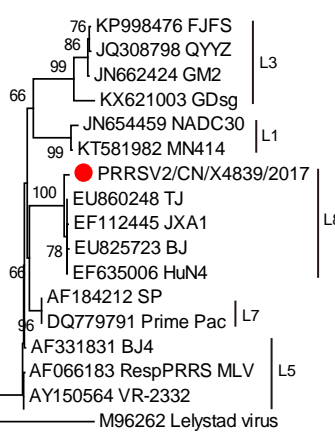

SD-YL1712

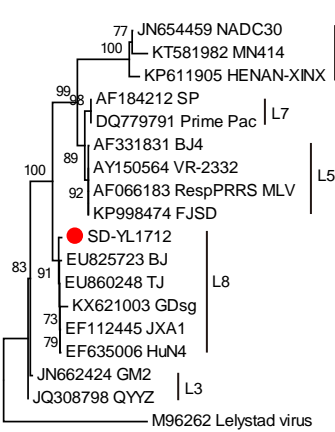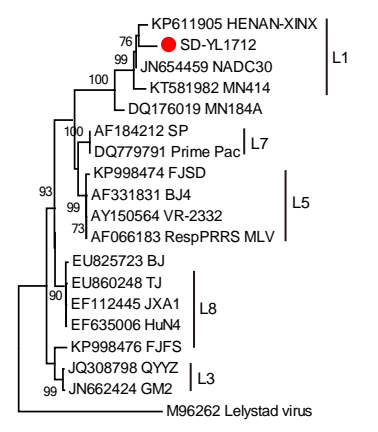

PRRSV2/CN/X4831/2018

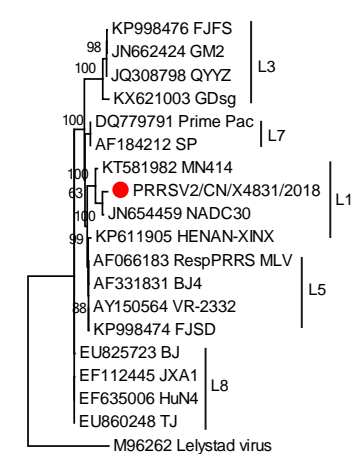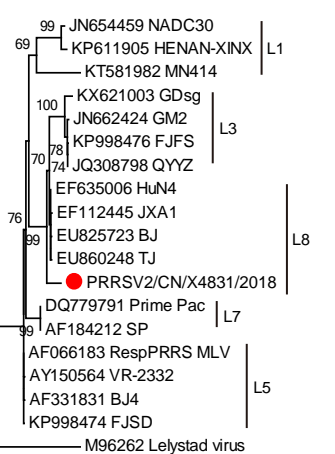

GD1909

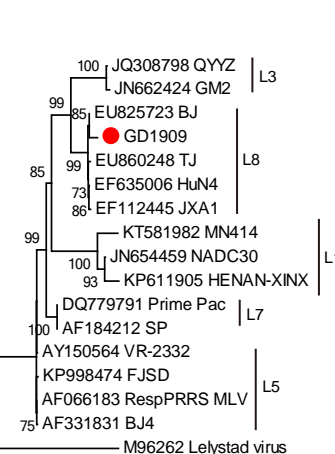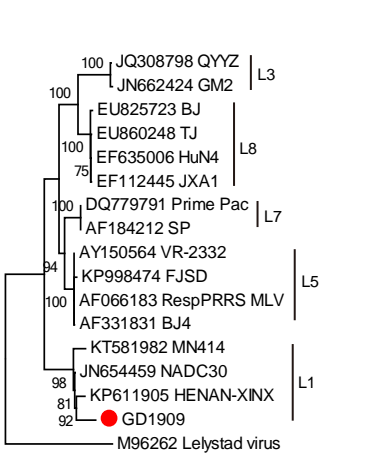

### SD99-1606

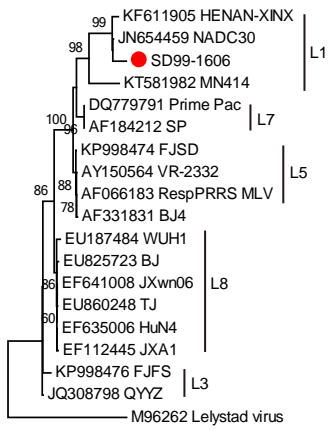

### HBap4/2018

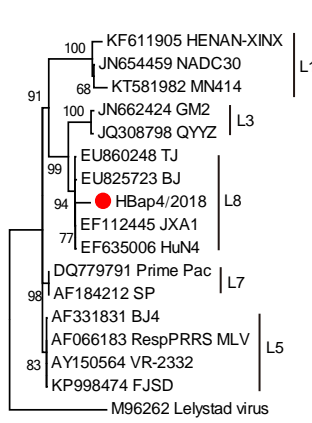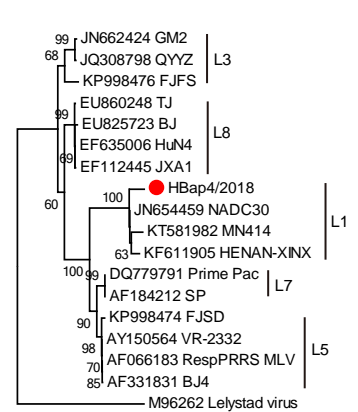

### SD1704-23

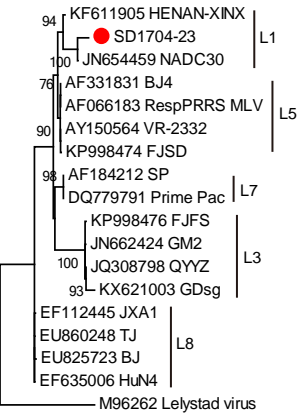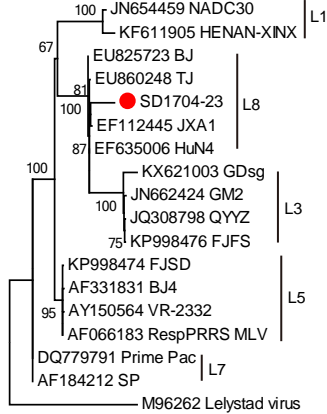

### S136

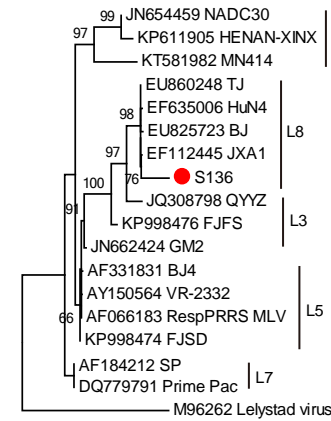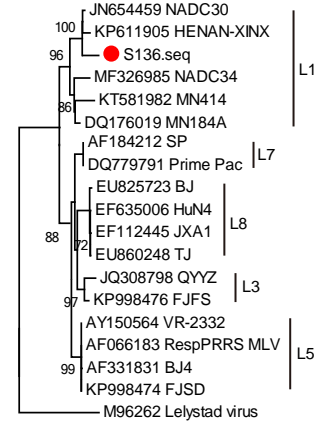

### HN1804-2

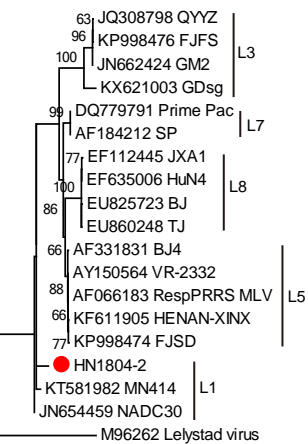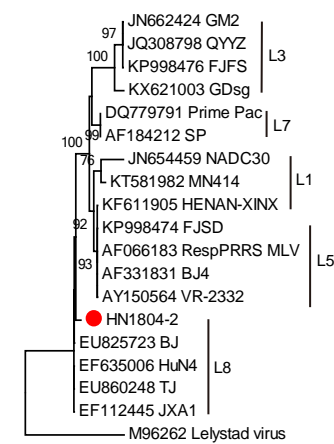

### SD/DJY

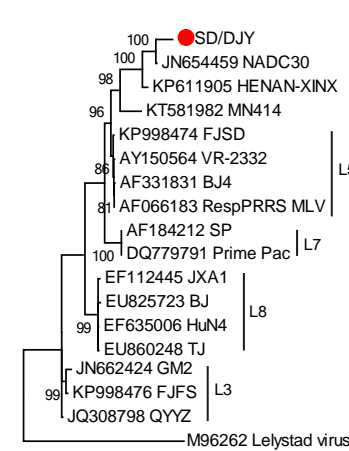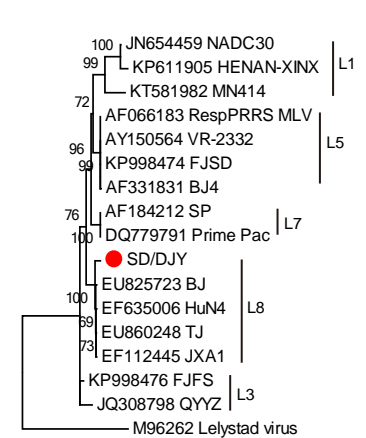

### SCcd2020

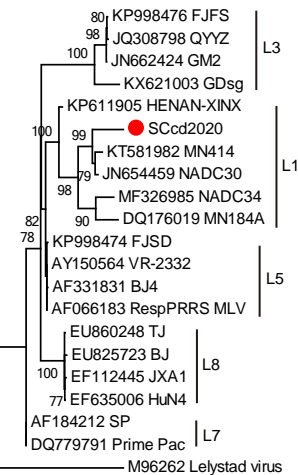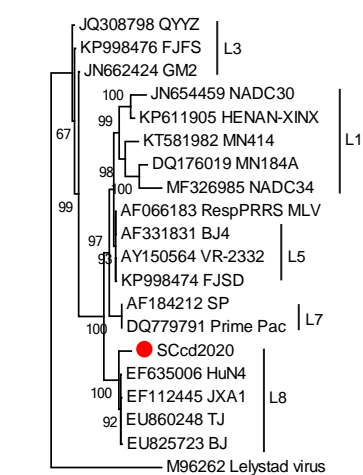

### GDsc1808

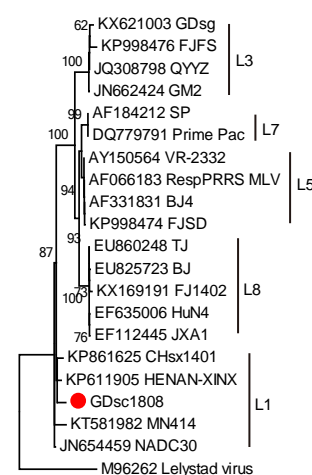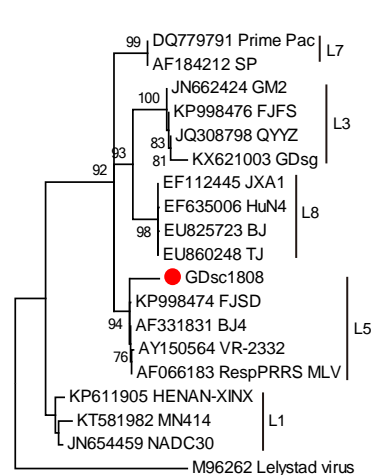

### SDwh1403

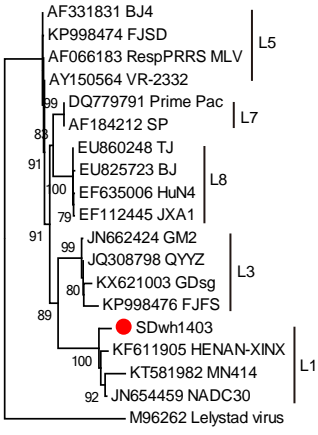

### HZ1-3\_Yunnan\_20171

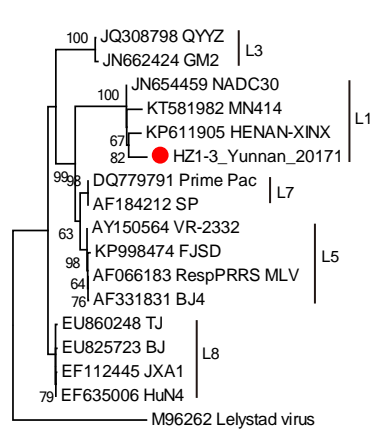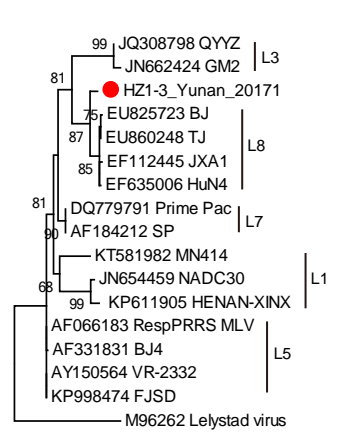

### FS-GD-02

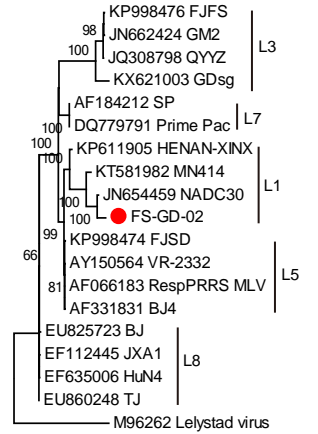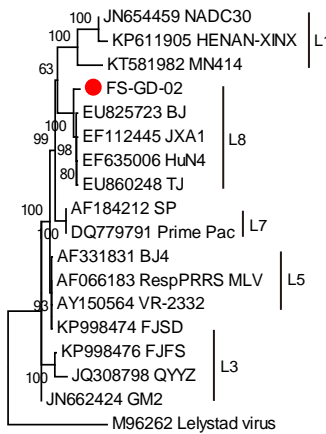

### S145

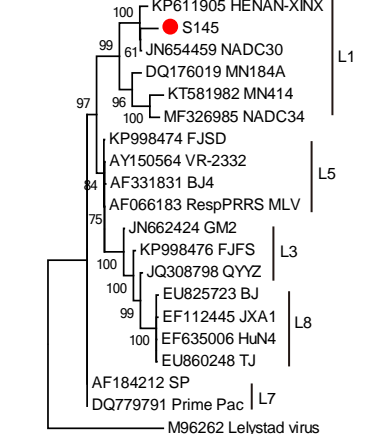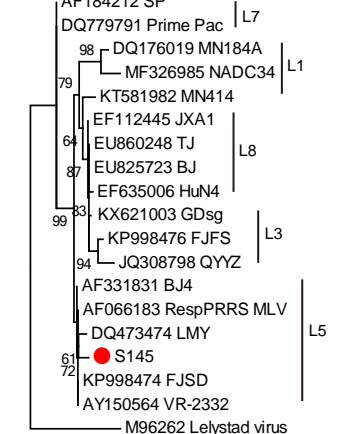

### S001

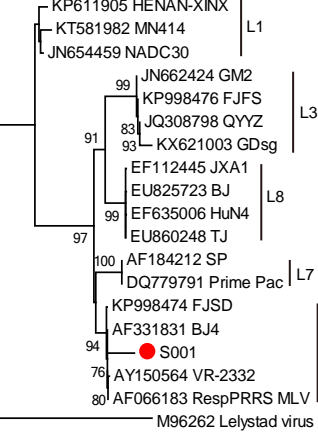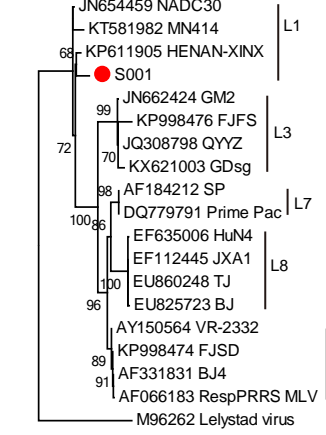

### PRRSV2/CN/110713/2018

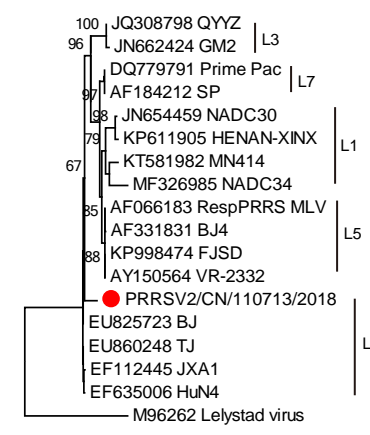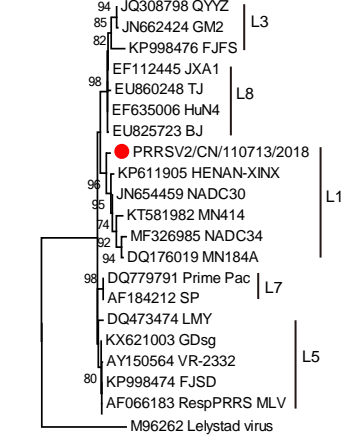



Fig. S2 Phylogenetic analysis based on the recombinant region of recombinant strains.

Supplementary Table 1. Strains information used in this study.

| Accession number | Strain        | Date | Country | Province/<br>States | Lineage |
|------------------|---------------|------|---------|---------------------|---------|
| AF176348         | PA8           | na   | Canada  | Alberta             | L5      |
|                  | HB94-lun      | 2019 | China   | Hebei               | L1      |
|                  | S145          | 2019 | China   | Shandong            | L1      |
|                  | S130-lym      | 2019 | China   | Shandong            | L1      |
|                  | G52           | 2018 | China   | Guangdong           | L8      |
|                  | G101-lun      | 2019 | China   | Guangdong           | L5      |
|                  | S039          | 2018 | China   | Shandong            | L1      |
|                  | S75           | 2018 | China   | Shandong            | L8      |
|                  | S022-lun      | 2018 | China   | Shandong            | L8      |
|                  | H60-lun       | 2018 | China   | Hebei               | L1      |
|                  | NA80-lun      | 2018 | China   | Heilongjiang        | L5      |
|                  | HB96-lun      | 2019 | China   | Hebei               | L5      |
|                  | LN86-lun      | 2018 | China   | Liaoning            | L1      |
|                  | G122-lun      | 2018 | China   | Guangdong           | L8      |
|                  | S032-lun      | 2018 | China   | Shandong            | L8      |
|                  | S78-lun       | 2018 | China   | Shandong            | L1      |
|                  | H013          | 2018 | China   | Hebei               | L1      |
|                  | S77           | 2018 | China   | Shandong            | L1      |
|                  | S020          | 2018 | China   | Shandong            | L1      |
|                  | S70           | 2018 | China   | Shandong            | L3      |
|                  | G59-lun       | 2018 | China   | Guangdong           | L3      |
|                  | G128-lun      | 2018 | China   | Guangdong           | L3      |
|                  | C103-lun      | 2019 | China   | Chongqing           | L5      |
|                  | G113-lun      | 2018 | China   | Guangdong           | L3      |
|                  | S043          | 2018 | China   | Shandong            | L1      |
|                  | S136-lun      | 2019 | China   | Shandong            | L1      |
|                  | H012          | 2018 | China   | Hebei               | L1      |
|                  | S001-lun      | 2018 | China   | Shandong            | L1      |
|                  | H64           | 2019 | China   | Heilongjiang        | L1      |
|                  | ZJ83-lun      | 2018 | China   | Zhejiang            | L3      |
|                  | AF331831      | BJ-4 | 1997    | China               | Beijing |
| AY032626         | CH-1a         | 1996 | China   | Beijing             | L8      |
| AY150312         | HB-1(sh)/2002 | 2002 | China   | Hebei               | L8      |
| AY262352         | HB-2(sh)/2002 | 2002 | China   | Hebei               | L8      |
| AY457635         | HN1           | na   | China   | Hunan               | L5      |
| DQ459471         | S1            | na   | China   | na                  | L5      |
| EF075945         | HUB1          | 2006 | China   | Hubei               | L8      |
| EF112445         | JXA1          | 2006 | China   | Jiangxi             | L8      |
| EF112446         | HUB2          | 2006 | China   | Hubei               | L8      |
| EF112447         | HEB1          | 2006 | China   | Hebei               | L8      |

|            |           |      |       |           |    |
|------------|-----------|------|-------|-----------|----|
| EF153486   | CC-1      | 2005 | China | Jilin     | L5 |
| EF517962   | HuN       | na   | China | Hunan     | L8 |
| EF635006   | HUN4      | 2006 | China | Hunan     | L8 |
| EF641008   | JXwn06    | 2006 | China | Jiangxi   | L8 |
| EU097706   | NX06      | 2006 | China | Ningxia   | L8 |
| EU097707   | BJsy06    | 2006 | China | Beijing   | L8 |
| EU106888   | SHH       | 2006 | China | Shanghai  | L8 |
| EU109502   | LN        | 2006 | China | Liaoning  | L8 |
| EU109503   | GD        | 2006 | China | Guangdong | L8 |
| EU144079   | SY0608    | 2006 | China | Jiangsu   | L8 |
| EU187484   | WUH1      | 2007 | China | Hubei     | L8 |
| EU200961   | Jiangxi-3 | na   | China | Jiangxi   | L8 |
| EU200962   | Henan-1   | na   | China | Henan     | L8 |
| EU236259   | HPBEDV    | na   | China | na        | L8 |
| EU262603   | Em2007    | 2007 | China | Hubei     | L8 |
| EU624117   | XH-GD     | 2007 | China | Guangdong | L8 |
| EU678352   | WUH2      | na   | China | Hubei     | L8 |
| EU708726   | JX143     | 2006 | China | Jiangxi   | L8 |
| EU825723   | BJ        | 2007 | China | Beijing   | L8 |
| EU825724   | GD        | 2007 | China | Guangdong | L8 |
| EU860248   | TJ        | 2006 | China | Tianjin   | L8 |
| EU860249   | NM1       | 2007 | China | Inner     | L8 |
|            |           |      |       | Mongolia  |    |
| EU864231   | CG        | 2007 | China | na        | L8 |
| EU864232   | SHB       | 2005 | China | na        | L8 |
| EU864233   | TP        | 2006 | China | na        | L8 |
| EU880431.2 | GS2008    | 2008 | China | Gansu     | L8 |
| EU880432.2 | JX2006    | 2006 | China | Jiangxi   | L8 |
| EU880433.2 | GD2007    | 2007 | China | Guangdong | L8 |
| EU880434.2 | SX2007    | 2007 | China | Shanxi    | L8 |
| EU880435.2 | YN2008    | 2008 | China | Yunnan    | L8 |
| EU880436   | XL2008    | 2008 | China | na        | L8 |
| EU880437.2 | HN2007    | 2007 | China | Hunan     | L8 |
| EU880438   | CH2002    | 2002 | China | na        | L8 |
| EU880439   | CH2004    | 2004 | China | na        | L8 |
| EU880440   | CH2003    | 2003 | China | na        | L8 |
| EU880441.2 | GS2002    | 2002 | China | Gansu     | L5 |
| EU880442.2 | GS2003    | 2003 | China | Gansu     | L5 |
| EU880443.3 | GS2004    | 2004 | China | Gansu     | L5 |
| EU939312   | JSyx      | 2006 | China | Jiangsu   | L8 |
| FJ175687   | PRRSV01   | na   | China | na        | L5 |
| FJ175688   | PRRSV02   | na   | China | na        | L5 |
| FJ175689   | PRRSV03   | na   | China | na        | L5 |

|            |             |      |       |                   |    |
|------------|-------------|------|-------|-------------------|----|
| FJ393456   | 07NM        | 2007 | China | Inner<br>Mongolia | L8 |
| FJ393457   | 07HEN       | 2007 | China | Henan             | L8 |
| FJ393458   | 07HEBTJ     | 2007 | China | Hebei             | L8 |
| FJ393459   | 07BJ        | 2007 | China | Beijing           | L8 |
| FJ536165   | NB/04       | 2004 | China | Zhejiang          | L8 |
| FJ797690   | HN-HW       | 2006 | China | Hunan             | L8 |
| FJ889129   | CBB-1-F3    | 2008 | China | na                | L8 |
| FJ889130   | CWZ-1-F3    | 2008 | China | na                | L8 |
| FJ895329   | SX2009      | 2009 | China | Shanxi            | L8 |
| FJ950744   | BJSY-1      | 2007 | China | Beijing           | L8 |
| FJ950745   | BJBLZ       | 2007 | China | Beijing           | L8 |
| FJ950746   | BJPG        | 2007 | China | Beijing           | L8 |
| FJ950747   | BJSD        | 2007 | China | Beijing           | L8 |
| GQ330474   | APRRS       | na   | China | na                | L7 |
| GQ351601   | BJ0706      | 2007 | China | Beijing           | L8 |
| GQ359108   | SD-CXA/2008 | 2008 | China | Shandong          | L8 |
| GQ374441   | GDQJ        | 2007 | China | Guangdong         | L8 |
| GQ374442   | GDBY1       | 2008 | China | Guangdong         | L8 |
| GQ857656   | SX-1        | na   | China | Shanxi            | L8 |
| GQ914997   | SD1-100     | na   | China | Shandong          | L1 |
| GU143913   | GD          | 2009 | China | Guangdong         | L8 |
| GU168567   | 09HUB7      | 2009 | China | Hubei             | L8 |
| GU168568   | 09HUB5      | 2009 | China | Hubei             | L8 |
| GU168569   | 08SDWF      | 2008 | China | Shandong          | L8 |
| GU169411   | 08HuN       | 2008 | China | Hunan             | L8 |
| GU232735   | KP          | 2008 | China | na                | L8 |
| GU232738   | YN9         | 2008 | China | Yunnan            | L8 |
| GU269541   | GD3         | 2005 | China | Guangdong         | L8 |
| GU454850   | GDQY2       | 2007 | China | Guangdong         | L8 |
| GU461292   | AH0701      | 2007 | China | Anhui             | L8 |
| HM011104   | BJSY07      | 2007 | China | Beijing           | L8 |
| HM016158   | JN-HS       | 2008 | China | Shandong          | L8 |
| HM016159   | ZP-1        | 2009 | China | Shandong          | L8 |
| HM189676   | HLJHL       | 2009 | China | Heilongjiang      | L8 |
| HM214913   | GX09-16     | 2009 | China | Guangxi           | L8 |
| HM214914   | GX09-29     | 2009 | China | Guangxi           | L8 |
| HM214915   | GX09-32     | 2009 | China | Guangxi           | L8 |
| HM853673.2 | WUH3        | 2008 | China | Hubei             | L8 |
| HQ315835   | BB0907      | 2009 | China | Guangxi           | L8 |
| HQ315836   | NT0801      | 2008 | China | Jiangsu           | L8 |
| HQ315837   | SY0909      | 2009 | China | Jiangsu           | L8 |
| HQ401282   | Shaanxi-2   | 2007 | China | Shaanxi           | L8 |

|          |            |      |       |           |    |
|----------|------------|------|-------|-----------|----|
| HQ416720 | TA-12      | 2008 | China | Shandong  | L8 |
| HQ843178 | HLJ-09     | 2009 | China | Henan     | L8 |
| HQ843179 | HLM-09     | 2009 | China | Henan     | L8 |
| HQ843180 | SD-09      | 2009 | China | Shandong  | L8 |
| HQ843181 | SX-09      | 2009 | China | Shanxi    | L8 |
| JF268672 | 09SC       | 2009 | China | Sichuan   | L8 |
| JF268673 | 09HUN1     | 2009 | China | Hunan     | L8 |
| JF268674 | 09HUN2     | 2009 | China | Hunan     | L8 |
| JF268675 | 09JS       | 2009 | China | Jiangsu   | L8 |
| JF268676 | 09BJ       | 2009 | China | Beijing   | L8 |
| JF268677 | 09DB1      | 2009 | China | na        | L8 |
| JF268678 | 09SD       | 2009 | China | Shandong  | L8 |
| JF268679 | 09HEB      | 2009 | China | Hebei     | L8 |
| JF268680 | 09HEN2     | 2009 | China | Henan     | L8 |
| JF268681 | 09DB2      | 2009 | China | na        | L8 |
| JF268682 | 09HUB1     | 2009 | China | Hubei     | L8 |
| JF268683 | 09HUB2     | 2009 | China | Hubei     | L8 |
| JF268684 | 09HEN1     | 2009 | China | Henan     | L8 |
| JF748717 | YD         | 2009 | China | na        | L8 |
| JF748718 | DC         | 2010 | China | na        | L8 |
| JF796180 | FS         | 2010 | China | Guangdong | L8 |
| JF796180 | FS         | 2010 | China | Guangdong | L8 |
| JF800911 | ZCYZ       | 2009 | China | Shandong  | L8 |
| JN256115 | SD0901     | 2009 | China | Shandong  | L8 |
| JN387271 | GDQY1      | 2007 | China | Guangdong | L8 |
| JN662424 | GM2        | 2011 | China | Guangdong | L3 |
| JN836553 | SCwhn09CD  | 2009 | China | Sichuan   | L8 |
| JN864948 | DY         | 2007 | China | Guangdong | L5 |
| JQ308798 | QYYZ       | 2011 | China | Guangdong | L3 |
| JQ309822 | GX10-42    | 2010 | China | Guangxi   | L8 |
| JQ309823 | GX10-48    | 2010 | China | Guangxi   | L8 |
| JQ326271 | WUH4       | 2011 | China | Hubei     | L8 |
| JQ663540 | 10-10JX    | 2010 | China | Jiangxi   | L8 |
| JQ663541 | 10-10BJ-1  | 2010 | China | Beijing   | L8 |
| JQ663542 | 10-10BJ-3  | 2010 | China | Beijing   | L8 |
| JQ663543 | 10-10BJ-2  | 2010 | China | Beijing   | L8 |
| JQ663544 | 10-10BJ-4  | 2010 | China | Beijing   | L8 |
| JQ663545 | 10-10BJ-5  | 2010 | China | Beijing   | L8 |
| JQ663546 | 10-10FUJ-1 | 2010 | China | Fujian    | L8 |
| JQ663547 | 10-10FUJ-2 | 2010 | China | Fujian    | L8 |
| JQ663548 | 10-10FUJ-3 | 2010 | China | Fujian    | L8 |
| JQ663549 | 10-10FUJ-4 | 2010 | China | Fujian    | L8 |
| JQ663550 | 10-10FUJ-5 | 2010 | China | Fujian    | L8 |

|          |               |      |       |              |    |
|----------|---------------|------|-------|--------------|----|
| JQ663551 | 10-10HEB-1    | 2010 | China | Hebei        | L8 |
| JQ663552 | 10-10HEB-2    | 2010 | China | Hebei        | L8 |
| JQ663553 | 10-10HEB-3    | 2010 | China | Hebei        | L8 |
| JQ663554 | 10-10JL       | 2010 | China | Jilin        | L8 |
| JQ663555 | 10-10SD       | 2010 | China | Shandong     | L8 |
| JQ663556 | 10-10QN       | 2010 | China | na           | L8 |
| JQ663558 | 10-10GX-1     | 2010 | China | Guangxi      | L8 |
| JQ663559 | 10-10GX-2     | 2010 | China | Guangxi      | L8 |
| JQ663560 | 10-10GX-3     | 2010 | China | Guangxi      | L8 |
| JQ663561 | 10-10GX-4     | 2010 | China | Guangxi      | L8 |
| JQ663562 | 10-10GX-5     | 2010 | China | Guangxi      | L8 |
| JQ715697 | NVDC-GD2-2011 | 2011 | China | Guangdong    | L8 |
| JQ715698 | NVDC-JS2-2011 | 2011 | China | Jiangsu      | L8 |
| JQ743666 | QY2010        | 2010 | China | Guangdong    | L3 |
| JQ955657 | GX1001        | 2010 | China | Guangxi      | L8 |
| JQ955658 | GX1002        | 2010 | China | Guangxi      | L8 |
| JX087437 | SD16          | 2012 | China | Shandong     | L8 |
| JX177644 | JL-04/12      | 2012 | China | Jilin        | L8 |
| JX192632 | 10HN-GD       | 2010 | China | Guangdong    | L8 |
| JX192633 | 10GZ-GD       | 2010 | China | Guangdong    | L8 |
| JX192634 | 10FS-GD       | 2010 | China | Guangdong    | L8 |
| JX192635 | 10FS1-GD      | 2010 | China | Guangdong    | L8 |
| JX192636 | 10BY-GD       | 2010 | China | Guangdong    | L8 |
| JX192637 | 10SJ-GD       | 2010 | China | Guangdong    | L8 |
| JX192638 | 10SS-GD       | 2010 | China | Guangdong    | L8 |
| JX192639 | 10ZQ-GD       | 2010 | China | Guangdong    | L8 |
| JX215551 | 11FS11-GD     | 2011 | China | Guangdong    | L8 |
| JX215552 | 10QY-GD       | 2010 | China | Guangdong    | L8 |
| JX215553 | 10HD-GD       | 2010 | China | Guangdong    | L8 |
| JX215554 | 11FS12-GD     | 2011 | China | Guangdong    | L8 |
| JX217036 | 11NZ-GD       | 2011 | China | Guangdong    | L8 |
| JX235365 | 11SH-GD       | 2011 | China | Guangdong    | L8 |
| JX235366 | 11SH1-GD      | 2011 | China | Guangdong    | L8 |
| JX235367 | 11XX-GD       | 2011 | China | Guangdong    | L8 |
| JX235370 | 11GZ-GD       | 2011 | China | Guangdong    | L8 |
| JX317648 | HV            | 2007 | China | Na           | L8 |
| JX317649 | JX            | 2010 | China | Jiangxi      | L8 |
| JX679179 | HH08          | 2011 | China | Heilongjiang | L8 |
| JX857698 | YN-2011       | 2011 | China | Yunan        | L5 |
| JX878379 | SDA2          | 2011 | China | Shandong     | L8 |
| JX878380 | SDA3          | 2011 | China | Shandong     | L8 |
| JX880029 | NJ-1106       | 2011 | China | Jiangsu      | L8 |
| JX912249 | GX1003        | 2010 | China | Guangxi      | L8 |



|          |            |      |       |                   |    |
|----------|------------|------|-------|-------------------|----|
| KC445138 | HZ-31      | 2012 | China | na                | L5 |
| KC527830 | GD-2011    | 2011 | China | Guangdong         | L8 |
| KF287132 | HK1        | 2003 | China | Hongkong          | L8 |
| KF287133 | HK2        | 2003 | China | Hongkong          | L3 |
| KF287134 | HK4        | 2003 | China | Hongkong          | L8 |
| KF287135 | HK6        | 2004 | China | Hongkong          | L3 |
| KF287136 | HK7        | 2004 | China | Hongkong          | L8 |
| KF287137 | HK9        | 2004 | China | Hongkong          | L3 |
| KF287138 | HK11       | 2004 | China | Hongkong          | L3 |
| KF287139 | HK12       | 2004 | China | Hongkong          | L8 |
| KF287140 | HK13       | 2005 | China | Hongkong          | L8 |
| KF287141 | HK14       | 2004 | China | Hongkong          | L5 |
| KF287142 | HK15       | 2004 | China | Hongkong          | L3 |
| KF287143 | HK16       | 2004 | China | Hongkong          | L3 |
| KF611905 | HENAN-XINX | 2013 | China | Henan             | L1 |
| KF678434 | SH1211     | 2012 | China | Shanghai          | L3 |
| KF751237 | BJ1102     | 2011 | China | Beijing           | L8 |
| KF751238 | LN1101     | 2011 | China | Liaoning          | L8 |
| KF771273 | GZ1101     | 2011 | China | Guizhou           | L5 |
| KF815525 | XJu-1      | 2012 | China | Xinjiang          | L8 |
| KJ002451 | HeNan-A1   | 2013 | China | Henan             | L8 |
| KJ002452 | HeNan-A2   | 2013 | China | Henan             | L8 |
| KJ019330 | Henan-A3   | 2013 | China | Henan             | L8 |
| KJ143621 | HENAN-HEB  | 2012 | China | Henan             | L1 |
| KJ534539 | Henan-A4   | 2013 | China | Henan             | L8 |
| KJ534540 | Henan-A5   | 2013 | China | Henan             | L8 |
| KJ534541 | Henan-A6   | 2013 | China | Henan             | L8 |
| KJ534542 | Henan-A7   | 2013 | China | Henan             | L8 |
| KJ534543 | Henan-A8   | 2013 | China | Henan             | L8 |
| KJ541663 | GZ106      | 2005 | China | Guizhou           | L8 |
| KJ546412 | HeNan-A9   | 2013 | China | Henan             | L8 |
| KJ591659 | HEB-2013   | 2013 | China | Hebei             | L8 |
| KJ609516 | MY-486     | 2013 | China | Henan             | L8 |
| KJ609517 | MY-376     | 2013 | China | Henan             | L8 |
| KJ747052 | YN-1       | 2011 | China | Yunnan            | L8 |
| KJ819934 | Henan-A12  | 2014 | China | Henan             | L8 |
| KJ819935 | Henan-A13  | 2014 | China | Henan             | L8 |
| KJ819936 | Henan-A14  | 2014 | China | Henan             | L8 |
| KJ855518 | Shanxi-6   | 2010 | China | Shanxi            | L8 |
| KM000066 | NMG2014    | 2014 | China | Inner<br>Mongolia | L8 |
| KM189443 | SC2012     | 2012 | China | Sichuan           | L8 |
| KM261784 | HB2014001  | 2014 | China | Hubei             | L8 |

|          |                 |      |       |           |    |
|----------|-----------------|------|-------|-----------|----|
| KP162169 | HB-XL           | 2014 | China | na        | L8 |
| KP179402 | NT1             | na   | China | Jiangsu   | L8 |
| KP179403 | NT2             | na   | China | Jiangsu   | L8 |
| KP179404 | NT3             | na   | China | Jiangsu   | L8 |
| KP330232 | HUN-2014        | 2014 | China | Hunan     | L8 |
| KP742986 | TJbd14-1        | 2014 | China | Tianjin   | L8 |
| KP742987 | TJbd14-2        | 2014 | China | Tianjin   | L8 |
| KP771735 | NVDC-SHH02-2014 | 2014 | China | Shanghai  | L8 |
| KP771736 | NVDC-shh01-2014 | 2014 | China | Shanghai  | L8 |
| KP771737 | NVDC-SD6-2014   | 2014 | China | Shandong  | L8 |
| KP771738 | NVDC-SD1-2014   | 2014 | China | Shandong  | L8 |
| KP771739 | NVDC-SC1-2014   | 2014 | China | Sichuan   | L8 |
| KP771740 | NVDC-SXJC-2013  | 2013 | China | Shanxi    | L8 |
| KP771741 | NVDC-SDXX-2013  | 2013 | China | Shandong  | L8 |
| KP771742 | NVDC-HBCZ-2013  | 2013 | China | Hubei     | L8 |
| KP771743 | NVDC-BJPG-2013  | 2013 | China | Beijing   | L8 |
| KP771744 | NVDC-HeB2-2013  | 2013 | China | Hebei     | L8 |
| KP771745 | NVDC-HeB1-2013  | 2013 | China | Hebei     | L8 |
| KP771746 | NVDC-CQ1-2011   | 2011 | China | Chongqing | L8 |
| KP771747 | NVDC-CQ1-2012   | 2012 | China | Chongqing | L8 |
| KP771748 | NVDC-BJ2-2011   | 2011 | China | Beijing   | L8 |
| KP771749 | NVDC-HeB1-2011  | 2011 | China | Hebei     | L8 |
| KP771750 | NVDC-MD2-2013   | 2013 | China | na        | L8 |
| KP771751 | NVDC-MD1-2013   | 2013 | China | na        | L8 |
| KP771752 | HEB 20130008-14 | 2013 | China | Hebei     | L8 |
| KP771753 | HEB 20130008-13 | 2013 | China | Hebei     | L8 |
| KP771754 | NVDC-HeB-2008   | 2008 | China | Hebei     | L8 |
| KP771755 | NVDC-CQ-2008    | 2008 | China | Chongqing | L8 |
| KP771756 | NVDC-BJ9-2012   | 2012 | China | Beijing   | L8 |
| KP771757 | NVDC-BJ8-2012   | 2012 | China | Beijing   | L8 |
| KP771758 | NVDC-BJ7-2012   | 2012 | China | Beijing   | L8 |
| KP771759 | NVDC-BJ6-2012   | 2012 | China | Beijing   | L8 |
| KP771760 | NVDC-BJ5-2012   | 2012 | China | Beijing   | L8 |
| KP771761 | NVDC-BJ4-2012   | 2012 | China | Beijing   | L8 |
| KP771762 | NVDC-BJ3-2012   | 2012 | China | Beijing   | L8 |
| KP771763 | NVDC-BJ2-2012   | 2012 | China | Beijing   | L8 |
| KP771764 | NVDC-BJ1-2012   | 2012 | China | Beijing   | L8 |
| KP771765 | NVDC-HeB2-2011  | 2011 | China | Hebei     | L8 |
| KP771766 | NVDC-GD-2011    | 2011 | China | Guangdong | L8 |
| KP771767 | NVDC-YN-2011    | 2011 | China | Yunnan    | L8 |
| KP771768 | NVDC-SD2-2012   | 2012 | China | Shandong  | L8 |
| KP771769 | NVDC-SD1-2012   | 2012 | China | Shandong  | L8 |
| KP771770 | NVDC-HuN-2011   | 2012 | China | Hunan     | L8 |

|          |                  |      |       |                   |    |
|----------|------------------|------|-------|-------------------|----|
| KP771771 | NVDC-HeN-2012    | 2012 | China | Henan             | L8 |
| KP771772 | NVDC-HeB2-2012   | 2012 | China | Hebei             | L8 |
| KP771773 | NVDC-HeB1-2012   | 2012 | China | Hebei             | L8 |
| KP771774 | NVDC-CQ3-2011    | 2011 | China | Chongqing         | L8 |
| KP771775 | NVDC-CQ3-2012    | 2012 | China | Chongqing         | L8 |
| KP771776 | NVDC-CQ2-2012    | 2012 | China | Chongqing         | L8 |
| KP771777 | NVDC-CQ4-2012    | 2012 | China | Chongqing         | L8 |
| KP771778 | NVDC-BJ1-2011    | 2011 | China | Beijing           | L8 |
| KP771779 | NVDC-NM-2008     | 2008 | China | Inner<br>Mongolia | L8 |
| KP771780 | NVDC-13SXJC-2014 | 2014 | China | Shanxi            | L8 |
| KP771781 | NVDC-HuNCS-2014  | 2014 | China | Hunan             | L8 |
| KP771782 | NVDC-R38-2014    | 2014 | China | na                | L8 |
| KP771783 | NVDC-R224-2014   | 2014 | China | na                | L8 |
| KP771784 | NVDC-SD4-2014    | 2014 | China | Shandong          | L8 |
| KP780881 | 14LY01-FJ        | 2014 | China | Fujian            | L8 |
| KP780882 | 14LY02-FJ        | 2014 | China | Fujian            | L8 |
| KP793736 | GD-HD            | 2011 | China | Guangdong         | L8 |
| KP860909 | FJZ03            | na   | China | Fujian            | L1 |
| KP860910 | FJY04            | na   | China | Fujian            | L1 |
| KP860911 | FJW05            | na   | China | Fujian            | L1 |
| KP861625 | CHsx1401         | 2014 | China | Shanxi            | L1 |
| KP998401 | 17199            | 2005 | China | Taiwan            | L3 |
| KP998402 | 312              | 2005 | China | Taiwan            | L3 |
| KP998403 | 1483             | 2012 | China | Taiwan            | L3 |
| KP998404 | 338              | 2011 | China | Taiwan            | L3 |
| KP998406 | HC120821-SH1     | 2012 | China | Taiwan            | L3 |
| KP998407 | HC120821-SH2     | 2012 | China | Taiwan            | L3 |
| KP998408 | HC120821-LL      | 2012 | China | Taiwan            | L3 |
| KP998409 | HC120904-CHYL    | 2012 | China | Taiwan            | L3 |
| KP998410 | JM               | 2011 | China | Taiwan            | L3 |
| KP998412 | 25934            | 2008 | China | Taiwan            | L3 |
| KP998413 | 310              | 2005 | China | Taiwan            | L3 |
| KP998414 | 660              | 2009 | China | Taiwan            | L3 |
| KP998415 | 803              | 2013 | China | Taiwan            | L3 |
| KP998416 | CH               | 2002 | China | Taiwan            | L3 |
| KP998418 | HL               | 2004 | China | Taiwan            | L3 |
| KP998419 | M1               | 2001 | China | Taiwan            | L3 |
| KP998420 | NT               | 2000 | China | Taiwan            | L3 |
| KP998421 | Q94-136          | 2005 | China | Taiwan            | L3 |
| KP998422 | TD/TP            | 1998 | China | Taiwan            | L3 |
| KP998423 | Tsai             | 1999 | China | Taiwan            | L3 |
| KP998424 | TY1              | 2000 | China | Taiwan            | L3 |

|          |            |      |       |              |    |
|----------|------------|------|-------|--------------|----|
| KP998425 | TD1        | 1997 | China | Taiwan       | L3 |
| KP998426 | CH8V-J2    | 2003 | China | Taiwan       | L3 |
| KP998427 | TD-2       | 2004 | China | Taiwan       | L3 |
| KP998429 | WSV        | 1992 | China | Taiwan       | L5 |
| KP998430 | HC120629   | 2012 | China | Taiwan       | L3 |
| KP998431 | MD001      | 1991 | China | Taiwan       | L3 |
| KP998474 | FJSD       | na   | China | Fujian       | L5 |
| KP998475 | FJE1       | na   | China | Fujian       | L8 |
| KP998476 | FJFS       | na   | China | Fujian       | L3 |
| KP998477 | FJCH       | na   | China | Fujian       | L8 |
| KP998478 | FJZH       | na   | China | Fujian       | L8 |
| KP998479 | FJOU       | na   | China | Fujian       | L8 |
| KR149645 | JXja15     | 2015 | China | Jiangxi      | L8 |
| KR706343 | JL580      | 2013 | China | Jilin        | L1 |
| KT022071 | HNxa14     | 2014 | China | Hunan        | L8 |
| KT022072 | HNyc13     | 2013 | China | Hunan        | L8 |
| KT180169 | XF1129     | 2013 | China | na           | L8 |
| KT351739 | HLJA1      | 2013 | China | Heilongjiang | L8 |
| KT351740 | HLJB1      | 2013 | China | Heilongjiang | L8 |
| KT358728 | GZgy15-1   | 2015 | China | Guizhou      | L8 |
| KT445876 | HNP5       | 2014 | China | na           | L8 |
| KT804696 | FJYR       | na   | China | Fujian       | L8 |
| KT819203 | SCwhn14DY  | 2014 | China | Sichuan      | L8 |
| KT945017 | HNjz15     | 2015 | China | Henan        | L1 |
| KT945018 | HNyc15     | 2015 | China | Henan        | L3 |
| KU201579 | QH-08      | 2008 | China | Qinghai      | L8 |
| KU215416 | 15LY01-FJ  | 2015 | China | Fujian       | L8 |
| KU215417 | 15LY02-FJ  | 2015 | China | Fujian       | L8 |
| KU523366 | WUH5       | 2015 | China | Hubei        | L1 |
| KU523367 | WUH6       | 2011 | China | Hubei        | L1 |
| KU950370 | HENPDS-2   | 2015 | China | Henan        | L8 |
| KU950371 | HENXC-4    | 2015 | China | Henan        | L1 |
| KU950372 | HENXX-1    | 2014 | China | Henan        | L1 |
| KU950373 | HENZK-1    | 2014 | China | Henan        | L8 |
| KU950374 | HENZMD-9   | 2015 | China | Henan        | L1 |
| KU950375 | HENZZ-8    | 2015 | China | Henan        | L8 |
| KU978619 | GD-KP      | 2015 | China | Guangdong    | L3 |
| KX169191 | FJ1402     | 2014 | China | Fujian       | L1 |
| KX357708 | QTX        | 2016 | China | na           | L8 |
| KX510269 | TJnh1501   | 2015 | China | Tianjin      | L8 |
| KX621003 | GDsg       | 2015 | China | Guangdong    | L3 |
| KX650082 | RVB-581    | 2008 | China | na           | L8 |
| KX689233 | XJzx1-2015 | 2015 | China | Xinjiang     | L3 |

---

|          |               |      |       |           |    |
|----------|---------------|------|-------|-----------|----|
| KX758249 | FJWQ16        | 2016 | China | Fujian    | L1 |
| KX758250 | FJXS15        | 2015 | China | Fujian    | L1 |
| KX766378 | HN07-1        | 2007 | China | Hunan     | L8 |
| KX766379 | HNhx          | 2016 | China | Hunan     | L1 |
| KX767091 | GSWW/CHA 2015 | 2015 | China | Gansu     | L8 |
| KX815407 | 15GD1         | 2015 | China | Guangdong | L8 |
| KX815408 | 15GD2         | 2015 | China | Guangdong | L8 |
| KX815409 | 15GD3         | 2015 | China | Guangdong | L8 |
| KX815410 | 15GD4         | 2015 | China | Guangdong | L8 |
| KX815411 | 15HEB1        | 2015 | China | Hebei     | L1 |
| KX815412 | 15HEB3        | 2015 | China | Hebei     | L8 |
| KX815413 | 15HEN1        | 2015 | China | Henan     | L1 |
| KX815414 | 15HEN3        | 2015 | China | Henan     | L8 |
| KX815415 | 15HEN4        | 2015 | China | Henan     | L1 |
| KX815416 | 15HUN1        | 2015 | China | Hunan     | L8 |
| KX815417 | 15HUN2        | 2015 | China | Hunan     | L8 |
| KX815418 | 15HUN3        | 2015 | China | Hunan     | L8 |
| KX815419 | 15JX1         | 2015 | China | Jiangxi   | L1 |
| KX815420 | 15JX2         | 2015 | China | Jiangxi   | L8 |
| KX815421 | 15JX3         | 2015 | China | Jiangxi   | L8 |
| KX815422 | 15JX4         | 2015 | China | Jiangxi   | L8 |
| KX815423 | 15LN1         | 2015 | China | Liaoning  | L1 |
| KX815424 | 15LN2         | 2015 | China | Liaoning  | L8 |
| KX815425 | 15LN3         | 2015 | China | Liaoning  | L1 |
| KX815426 | 15SC1         | 2015 | China | Sichuan   | L8 |
| KX815427 | 15SC2         | 2015 | China | Sichuan   | L8 |
| KX815428 | 15SC3         | 2015 | China | Sichuan   | L1 |
| KX815429 | 15SN1         | 2015 | China | Shannxi   | L8 |
| KX815430 | 15SN2         | 2015 | China | Shannxi   | L8 |
| KX815431 | 15SN3         | 2015 | China | Shannxi   | L8 |
| KX815432 | 15ZJ1         | 2015 | China | Zhejiang  | L1 |
| KX815433 | 15ZJ2         | 2015 | China | Zhejiang  | L8 |
| KX815434 | 15ZJ3         | 2015 | China | Zhejiang  | L8 |
| KX900392 | HENJY-2       | 2015 | China | Henan     | L1 |
| KX980392 | SDhz1512      | 2015 | China | Shandong  | L1 |
| KX980393 | SDlz1601      | 2016 | China | Shandong  | L8 |
| KY041782 | HENXX-8       | 2016 | China | Henan     | L1 |
| KY053458 | SDYG1606      | 2016 | China | Shandong  | L1 |
| KY290748 | HENXX-9       | 2016 | China | Henan     | L8 |
| KY373214 | JSWA          | 2014 | China | Jiangsu   | L1 |
| KY373215 | HiNZWQ        | 2014 | China | Hainan    | L3 |
| KY373216 | AHBZ          | 2014 | China | Anhui     | L8 |
| KY373217 | SDZZ          | 2014 | China | Shandong  | L8 |

---

|          |             |      |       |           |    |
|----------|-------------|------|-------|-----------|----|
| KY373218 | SXF105      | 2014 | China | Shanxi    | L8 |
| KY412887 | FJL15       | 2014 | China | Fujian    | L1 |
| KY412888 | FJM4        | 2014 | China | Fujian    | L1 |
| KY488470 | GDJM        | 2014 | China | Guangdong | L8 |
| KY488471 | GDGZ        | 2014 | China | Guangdong | L8 |
| KY488472 | GDMM        | 2014 | China | Guangdong | L8 |
| KY488473 | GDZQ        | 2014 | China | Guangdong | L8 |
| KY488474 | HNHK2       | 2014 | China | Hunan     | L8 |
| KY488475 | HNHK1       | 2014 | China | Hunan     | L8 |
| KY488476 | GDHY        | 2015 | China | Guangdong | L8 |
| KY488477 | GDHZ        | 2015 | China | Guangdong | L8 |
| KY488478 | GDQY        | 2015 | China | Guangdong | L8 |
| KY488479 | GDSG        | na   | China | Guangdong | L8 |
| KY495780 | JX/CH/2016  | 2016 | China | Jiangxi   | L3 |
| KY495781 | SH/CH/2016  | 2016 | China | Shanghai  | L3 |
| KY498542 | GDST        | 2014 | China | Guangdong | L8 |
| KY745901 | GDYDZZZ     | 2016 | China | Guangdong | L3 |
| KY761966 | FZ16A       | 2016 | China | Fujian    | L8 |
| MF124329 | GD1404      | 2014 | China | Guangdong | L3 |
| MF196905 | SCcd16      | 2016 | China | Sichuan   | L3 |
| MF196906 | SCnj16      | 2016 | China | Sichuan   | L1 |
| MF370557 | FZ06A       | 2006 | China | Fujian    | L8 |
| MF375260 | SD-A19      | 2015 | China | Shandong  | L1 |
| MF375261 | SC-d        | 2015 | China | Sichuan   | L1 |
| MF526896 | GDQYQC2     | 2016 | China | Guangdong | L8 |
| MF669720 | GD1404      | 2014 | China | Guangdong | L8 |
| MF669721 | HZL1501     | 2015 | China | Na        | L8 |
| MF669722 | ZJXS1412    | 2014 | China | Zhejiang  | L8 |
| MF689000 | HeN1201     | 2012 | China | Henan     | L8 |
| MF766470 | HeN1301     | 2013 | China | Henan     | L8 |
| MF766471 | HeN1401     | 2014 | China | Henan     | L1 |
| MF766472 | HeN1501     | 2015 | China | Henan     | L8 |
| MF766473 | HeN1502     | 2015 | China | Henan     | L8 |
| MF766474 | HeN1601     | 2016 | China | Henan     | L1 |
| MF770574 | 17-ZJ-HZ    | 2017 | China | Zhejiang  | L8 |
| MF772778 | GDzj        | na   | China | Guangdong | L8 |
| MF818049 | SC/NJ 2016  | 2016 | China | Sichuan   | L8 |
| MG011718 | FJLIUY-2017 | 2017 | China | Fujian    | L3 |
| MG011719 | FJDJQ-2017  | 2017 | China | Fujian    | L3 |
| MG687491 | QHD1        | 2017 | China | Qinghai   | L1 |
| MG844181 | HB17A       | 2017 | China | Hebei     | L1 |
| MG860516 | LNWK96      | 2017 | China | Liaoning  | L1 |
| MG913987 | LNWK130     | 2017 | China | Liaoning  | L1 |



---

|          |                      |      |       |           |    |
|----------|----------------------|------|-------|-----------|----|
| MG914067 | SCcd17               | 2017 | China | Sichuan   | L1 |
| MH046842 | FJNP2017             | 2017 | China | Fujian    | L3 |
| MH046843 | GDZS2016             | 2016 | China | Guangdong | L3 |
| MH068878 | SD17-38              | 2017 | China | Shandong  | L1 |
| MH078490 | SCN17                | 2017 | China | Sichuan   | L1 |
| MH121061 | SD17-36              | 2017 | China | Guangdong | L1 |
| MH167387 | QHD2                 | 2017 | China | Qinghai   | L1 |
| MH167388 | QHD3                 | 2017 | China | Qinghai   | L1 |
| MH236426 | ZJnb16-2             | 2016 | China | Zhejiang  | L3 |
| MH324400 | SCya17               | 2017 | China | Sichuan   | L3 |
| MH370474 | CH/2018/NCV-Anheal-1 | 2018 | China | na        | L1 |
| MH404256 | SD17                 | 2017 | China | Shandong  | L8 |
| MH588710 | SDbz16-2             | 2016 | China | Shandong  | L1 |
| MH651736 | CY1-1604             | 2016 | China | na        | L1 |
| MH651737 | CY2-1604             | 2016 | China | na        | L1 |
| MH651738 | HNJYF-1606           | 2016 | China | Hunan     | L1 |
| MH651739 | HBFL-1604            | 2016 | China | Hubei     | L1 |
| MH651740 | HNJYH-1606           | 2016 | China | Hunan     | L1 |
| MH651741 | LNCH-1604            | 2016 | China | Liaoning  | L1 |
| MH651742 | SDQD-1604            | 2016 | China | Shandong  | L1 |
| MH651743 | SD-1602              | 2016 | China | Shandong  | L1 |
| MH651744 | SD53-1603            | 2016 | China | Shandong  | L1 |
| MH651745 | SD99-1606            | 2016 | China | Shandong  | L1 |
| MH651746 | SDQZ-1609            | 2016 | China | Shandong  | L1 |
| MH651747 | SDZC-1609            | 2016 | China | Shandong  | L8 |
| MH651748 | TJZH-1607            | 2016 | China | Tianjin   | L1 |
| MH663433 | HNRZ                 | 2017 | China | Hunan     | L8 |
| MK144542 | GZgy17               | 2017 | China | Guizhou   | L3 |
| MK144543 | SCya18               | 2018 | China | Sichuan   | L3 |
| MK202794 | FJ0908               | 2018 | China | Fujian    | L1 |
| MK396376 | GDsf1707             | 2017 | China | Guangdong | L1 |
| MK396377 | GDsf1710             | 2017 | China | Guangdong | L1 |
| MK396378 | GDsf1711             | 2017 | China | Guangdong | L1 |
| MK396379 | GDsf1802             | 2018 | China | Guangdong | L1 |
| MK396380 | GDsf1804             | 2018 | China | Guangdong | L1 |
| MK396381 | GDsf1806             | 2018 | China | Guangdong | L1 |
| MK396382 | GDsf1807             | 2018 | China | Guangdong | L1 |
| MK396383 | GDsf1808             | 2018 | China | Guangdong | L1 |
| MK396384 | GDsf1809             | 2018 | China | Guangdong | L1 |
| MK429980 | SWU/MS2/2018         | 2018 | China | Sichuan   | L1 |
| MK429981 | SWU/MS3/2018         | 2018 | China | Sichuan   | L1 |
| MK429982 | SWU/MY5/2018         | 2018 | China | Sichuan   | L1 |
| MK429983 | SWU/MY6/2018         | 2018 | China | Sichuan   | L1 |

---

|          |                          |      |       |                   |    |
|----------|--------------------------|------|-------|-------------------|----|
| MK429984 | SWU/YB1/2018             | 2018 | China | Sichuan           | L1 |
| MK429985 | SWU/YB2/2018             | 2018 | China | Sichuan           | L1 |
| MK429986 | SWU/CD1/2018             | 2018 | China | Sichuan           | L1 |
| MK429987 | SWU/CQ1/2018             | 2018 | China | Chongqing         | L5 |
| MK450333 | CH-WH-2019-1             | 2018 | China | Hubei             | L1 |
| MK450365 | CH-YY                    | 2018 | China | na                | L8 |
| MK453049 | PRRSV-ZDXYL-China-2018-1 | 2018 | China | Heilongjiang      | L1 |
| MK453050 | PRRSV-ZDXYL-China-2018-2 | 2018 | China | Heilongjiang      | L1 |
| MK759853 | XJ17-5                   | 2017 | China | Xinjiang          | L8 |
| MK780824 | SDWH27-1710              | 2017 | China | Shandong          | L3 |
| MK780825 | SD110-1608               | 2016 | China | Shandong          | L3 |
| MK906026 | JSTZ1712-12              | 2017 | China | Jiangsu           | L8 |
| MN026346 | GXBB16-1                 | 2016 | China | Guangxi           | L8 |
| MN026347 | NM-12                    | na   | China | na                | L8 |
| MN046221 | 2014-81                  | 2014 | China | Heilongjiang      | L8 |
| MN046222 | HLJ-80                   | 2016 | China | Heilongjiang      | L1 |
| MN046223 | HLJ-DZD1-1804            | 2018 | China | Heilongjiang      | L8 |
| MN046224 | HEB-108                  | 2017 | China | Hebei             | L1 |
| MN046225 | Fujian-2014-18           | 2014 | China | Fujian            | L1 |
| MN046226 | HeNXX-2014-3             | 2014 | China | Henan             | L1 |
| MN046227 | HeNXX-2014-9             | 2014 | China | Henan             | L8 |
| MN046228 | HeNXX-2014-12            | 2014 | China | Henan             | L1 |
| MN046229 | HeB-239                  | 2018 | China | Hebei             | L1 |
| MN046230 | HLJWK108-1711            | 2018 | China | Heilongjiang      | L1 |
| MN046231 | Anhui-2017-109           | 2017 | China | Anhui             | L8 |
| MN046232 | JS3-1805                 | 2018 | China | Jiangsu           | L8 |
| MN046233 | Liaoning-2017-6          | 2017 | China | Liaoning          | L8 |
| MN046234 | SDJM-1602                | 2016 | China | Shandong          | L8 |
| MN046235 | Gansu-2017-51            | 2017 | China | Gansu             | L8 |
| MN046236 | Sichuan-2017-117         | 2017 | China | Sichuan           | L8 |
| MN046237 | InterMo-2015-2           | 2015 | China | Inner<br>Mongolia | L8 |
| MN046238 | HN-1603                  | 2016 | China | Hunan             | L8 |
| MN046239 | HLJ-YC8                  | 2018 | China | Heilongjiang      | L8 |
| MN046240 | SX1-1607                 | 2016 | China | Shanxi            | L1 |
| MN046241 | SX2-1607                 | 2016 | China | Shanxi            | L1 |
| MN046242 | LN-DB87                  | 2018 | China | Liaoning          | L3 |
| MN046243 | HLJ-DZD4-1805            | 2018 | China | Heilongjiang      | L1 |
| MN119304 | SD1612-1                 | 2016 | China | Shandong          | L8 |
| MN119305 | SD1704-23                | 2017 | China | Shandong          | L1 |
| MN119306 | SH1704-25                | 2017 | China | Shanghai          | L8 |
| MN119307 | HN1804-2                 | 2018 | China | Henan             | L1 |
| MN119308 | JS1810-195               | 2018 | China | Jiangsu           | L8 |

|          |                                   |      |       |              |    |
|----------|-----------------------------------|------|-------|--------------|----|
| MN119309 | XJ1904-39                         | 2019 | China | Xinjiang     | L1 |
| MN401750 | SW2018001-YL                      | 2018 | China | Taiwan       | L3 |
| MN547964 | JS1703-21                         | 2017 | China | Jiangsu      | L8 |
| MN547965 | JSTZ1810-220                      | 2018 | China | Jiangsu      | L1 |
| MN547966 | JSTZ1904-664                      | 2019 | China | Jiangsu      | L8 |
| MN547967 | JSTZ1907-714                      | 2019 | China | Jiangsu      | L8 |
| MN606304 | JS18-3                            | 2018 | China | Jiangsu      | L1 |
| MN606305 | JX07                              | 2007 | China | Jiangxi      | L8 |
| MN642099 | SDqd1501                          | 2015 | China | Shandong     | L3 |
| MN642100 | SDwh1402                          | 2014 | China | Shandong     | L8 |
| MN642101 | SDwh1403                          | 2014 | China | Shandong     | L1 |
| MN642102 | SDwh1601                          | 2016 | China | Shandong     | L1 |
| MN642103 | SDwh1602                          | 2016 | China | Shandong     | L8 |
| MN642104 | SDwh1701                          | 2017 | China | Shandong     | L5 |
| MN642105 | SDyt1401                          | 2014 | China | Shandong     | L1 |
| MN648054 | LNDZD10-1806                      | 2018 | China | Liaoning     | L1 |
| MN648055 | HLJZD30-1902                      | 2019 | China | Heilongjiang | L1 |
| MN648449 | HLHDZD32-1901                     | 2019 | China | Heilongjiang | L1 |
| MN648450 | HLJZD22-1812                      | 2018 | China | Heilongjiang | L1 |
| MN660067 | GXNN1396-p3                       | 2013 | China | Guangxi      | L8 |
| MN660069 | GXYL1403                          | 2014 | China | Guangxi      | L8 |
| MN660070 | GXNN1839                          | 2018 | China | Guangxi      | L1 |
| MN862433 | FJDJQ-2018                        | 2018 | China | Fujian       | L1 |
| MT036897 | FS-GD-02_FoShan_Guangdong_2016.01 | 2016 | China | Guangdong    | L1 |
| MT036898 | GDHZ_Huizhou                      | 2017 | China | Guangdong    | L1 |
| MT036899 | HZ1-3_Yunnan_20171                | 2017 | China | Yunnan       | L1 |
| MT036900 | XY-HN_Xinyang                     | 2017 | China | Henan        | L1 |
| MT075480 | SC/DJY                            | 2019 | China | Sichuan      | L1 |
| MT165636 | GD1909                            | 2019 | China | Guangdong    | L1 |
| MT268280 | HB18-41                           | 2018 | China | Hubei        | L8 |
| MT316312 | HB18-4                            | 2019 | China | Hubei        | L8 |
| MT379661 | GDDX-2018                         | 2018 | China | Guangdong    | L8 |
| MT394494 | GDhh1808                          | 2018 | China | Guangdong    | L8 |
| MT394495 | GDxn1808                          | 2018 | China | Guangdong    | L1 |
| MT394496 | GDsc1808                          | 2018 | China | Guangdong    | L1 |
| MT394497 | GDsc1809                          | 2018 | China | Guangdong    | L1 |
| MT409687 | PRRSV2/CN/X4831/2018              | 2018 | China | na           | L1 |
| MT409688 | PRRSV2/CN/X9830/2018              | 2018 | China | na           | L1 |
| MT409689 | PRRSV2/CN/X4836/2018              | 2018 | China | na           | L1 |
| MT409690 | PRRSV2/CN/X2998/2018              | 2018 | China | na           | L8 |
| MT409691 | PRRSV2/CN/X4833/2018              | 2018 | China | na           | L1 |
| MT409692 | PRRSV2/CN/X4839/2017              | 2017 | China | na           | L1 |
| MT416541 | PRRSV2/CN/X2984/2018              | 2018 | China | na           | L8 |

|          |                           |      |       |              |    |
|----------|---------------------------|------|-------|--------------|----|
| MT416542 | PRRSV2/CN/N9185/2018      | 2018 | China | na           | L3 |
| MT416543 | PRRSV2/CN/F1228/2017      | 2017 | China | na           | L8 |
| MT416544 | PRRSV2/CN/F1004/2017      | 2017 | China | na           | L3 |
| MT416545 | PRRSV2/CN/101806/2018     | 2018 | China | na           | L8 |
| MT416546 | PRRSV2/CN/110713/2018     | 2018 | China | na           | L1 |
| MT416548 | PRRSV2/CN/101805/2018     | 2018 | China | na           | L5 |
| MT663768 | TS01                      | 2018 | China | na           | L8 |
| MT708500 | SD-YL1712                 | 2017 | China | Shandong     | L8 |
| MT721741 | PRRSV2/CN/GDDX/2018       | 2018 | China | Guangdong    | L8 |
| MT746146 | JSYC20-05-1               | 2020 | China | Jiangsu      | L5 |
| MT780871 | JSYZ1909-16               | 2019 | China | Jiangsu      | L8 |
| MT811822 | YNAN2018                  | 2018 | China | Yunnan       | L8 |
| MT811823 | YNCN2017                  | 2017 | China | Yunnan       | L8 |
| MT811824 | YNWH2016                  | 2017 | China | Yunnan       | L8 |
| MT811825 | YNCL2018                  | 2018 | China | Yunnan       | L8 |
| MT811826 | YNCXZX2017                | 2017 | China | Yunnan       | L8 |
| MT811827 | YNCX2016                  | 2016 | China | Yunnan       | L8 |
| MT811828 | YNDL2016                  | 2017 | China | Yunnan       | L8 |
| MT811829 | YNJN2016                  | 2016 | China | Yunnan       | L8 |
| MT811830 | YNYL2016                  | 2017 | China | Yunnan       | L8 |
| MT811831 | YNLQ2016                  | 2016 | China | Yunnan       | L8 |
| MT811832 | YNQJXW2017                | 2017 | China | Yunnan       | L8 |
| MT811833 | YNQJ2017                  | 2017 | China | Yunnan       | L8 |
| MT811834 | YNSD2017                  | 2017 | China | Yunnan       | L8 |
| MT811835 | YNSL2018                  | 2018 | China | Yunnan       | L8 |
| MT811836 | YNSM2016                  | 2016 | China | Yunnan       | L8 |
| MT811837 | YNSB2016                  | 2017 | China | Yunnan       | L8 |
| MT811838 | YNPL2016                  | 2016 | China | Yunnan       | L8 |
| MT811839 | YNXS2017                  | 2017 | China | Yunnan       | L8 |
| MT811840 | YNXW2017                  | 2017 | China | Yunnan       | L8 |
| MT811841 | YNML2018                  | 2018 | China | Yunnan       | L8 |
| MW079495 | 2020-Acheng-1             | 2020 | China | Heilongjiang | L1 |
| MW531679 | GXNN202004a               | 2020 | China | Guangxi      | L1 |
| MW561593 | GXNN202010                | 2020 | China | Guangxi      | L3 |
| MW561594 | GXNN202004                | 2020 | China | Guangxi      | L1 |
| MW627193 | HB18-36                   | 2018 | China | Hubei        | L8 |
| MW651975 | HB19-12                   | 2019 | China | Hubei        | L8 |
| MW651976 | HB19-18                   | 2019 | China | Hubei        | L8 |
| MW803134 | PRRSV-China/SCcd2020/2020 | 2020 | China | Sichuan      | L1 |
| MW853923 | AH-PRRS20178-1            | 2017 | China | Anhui        | L8 |
| MW880772 | SXSZ-2020                 | 2020 | China | Shanxi       | L1 |
| MZ172971 | SD-QD-2101                | 2020 | China | Shandong     | L8 |
| MZ322956 | SDRZ01                    | 2019 | China | Shandong     | L8 |

|          |                      |      |                |          |    |
|----------|----------------------|------|----------------|----------|----|
| MZ342900 | JS2020               | 2020 | China          | Jiangsu  | L1 |
| MZ579701 | HBap4/2018           | 2018 | China          | Hubei    | L8 |
| MZ820388 | JS2021NADC34         | 2021 | China          | Jiangsu  | L1 |
| KC862575 | DK-2012-01-11-3      | 2012 | Denmark        | na       | L5 |
| KC862576 | DK-1997-19407B       | 1997 | Denmark        | na       | L5 |
| KC862577 | DK-2011-030311-1     | 2011 | Denmark        | na       | L5 |
| KC862578 | DK-2004-1-7-PI       | 2004 | Denmark        | na       | L5 |
| KC862579 | DK-2010-10-1-2       | 2010 | Denmark        | na       | L5 |
| KC862580 | DK-2010-10-7-1       | 2010 | Denmark        | na       | L5 |
| KC862581 | DK-2010-10-2-1       | 2010 | Denmark        | na       | L5 |
| KC862582 | DK-2008-10-1-3       | 2008 | Denmark        | na       | L5 |
| KC862583 | DK-2010-10-4-1       | 2010 | Denmark        | na       | L5 |
| KC862584 | DK-2003-2-3          | 2003 | Denmark        | na       | L5 |
| KC862585 | DK-2004-2-1          | 2004 | Denmark        | na       | L5 |
| KF183946 | DK-2010-10-13-1      | 2010 | Denmark        | na       | L5 |
| KF183947 | DK-2011-88005-A8-PI  | 2011 | Denmark        | na       | L5 |
| KM514315 | PRRSV-2 102          | 2012 | Hungary        | na       | L1 |
| MK287894 | PRRSV/MZ/IND/1A/18   | 2018 | India          | na       | L8 |
| MK287895 | PRRSV/MZ/IND/24-A/18 | 2018 | India          | na       | L8 |
| MK315208 | PRRSV/MZ/IND/399A/18 | 2018 | India          | na       | L8 |
| MK315209 | PRRS/MZ/IND/DBT1/18  | 2018 | India          | na       | L8 |
| MK315210 | PRRS/MZ/IND/109A/18  | 2018 | India          | na       | L8 |
| AB288356 | EDRD-1               | 1992 | Japan          | Chiba    | L4 |
| AB811786 | Nagasaki11-14        | 2011 | Japan          | Nagasaki | L9 |
| AB811787 | Jam2                 | 2000 | Japan          | Aomori   | L5 |
| AB811788 | Yamagata10-7         | 2010 | Japan          | Yamagata | L4 |
| AB811789 | Aomori10-5           | 2010 | Japan          | Aomori   | L4 |
| LC008532 | Jpn5-37              | na   | Japan          | na       | L1 |
| JN626287 | BH58/10              | 2010 | Laos           | na       | L8 |
| JQ663557 | 10-LW1-13            | 2010 | Laos           | na       | L8 |
| JQ663563 | 10-LW2-6             | 2010 | Laos           | na       | L8 |
| JQ663564 | 10-LW3-7             | 2010 | Laos           | na       | L8 |
| JQ663565 | 10-10LW5-1           | 2010 | Laos           | na       | L8 |
| JQ663566 | 10-LW6-6             | 2010 | Laos           | na       | L8 |
| JQ663567 | 10-LW7-1             | 2010 | Laos           | na       | L8 |
| JQ663568 | 10-LW8-1             | 2010 | Laos           | na       | L8 |
| AY585241 | PL97-1               | 1997 | South<br>Korea | na       | L5 |
| DQ473474 | LMY                  | na   | South<br>Korea | na       | L5 |
| JX138233 | CP07-626-2           | 2007 | South<br>Korea | na       | L1 |
| JX138234 | e417-2               | 2009 | South          | na       | L4 |

---

|          |                          |      |                   |           |    |
|----------|--------------------------|------|-------------------|-----------|----|
| JX138235 | CP07-401-9               | 2007 | Korea<br>South    | na        | L5 |
| JX138236 | A4699                    | 2010 | Korea<br>South    | na        | L1 |
| KF555450 | CA-2                     | 2013 | Korea<br>South    | na        | L1 |
| KF555451 | KNU-12-KJ4               | 2013 | Korea<br>South    | na        | L1 |
| KP704287 | CVK3-6                   | na   | Korea<br>South    | na        | L1 |
| MK057529 | KU-N1202                 | 2012 | Korea<br>South    | na        | L5 |
| MK057530 | KU-N1606                 | 2016 | Korea<br>South    | na        | L1 |
| MK057531 | KU-N1702                 | 2017 | Korea<br>South    | na        | L1 |
| MK057532 | KU-N1712                 | 2017 | Korea<br>South    | na        | L5 |
| DQ056373 | 01NP1.2                  | na   | Korea<br>Thailand | na        | L5 |
| KF735060 | HP/Thailand/19500LL/2010 | 2010 | Thailand          | na        | L8 |
| AF325691 | NVSL 97-7985 IA 1-4-2    | 1997 | USA               | Iowa      | L8 |
| AY545985 | NVSL 97-7895             | na   | USA               | na        | L8 |
| DQ176019 | MN184A                   | na   | USA               | Minnesota | L1 |
| DQ176020 | MN184B                   | na   | USA               | Minnesota | L1 |
| EF532805 | Flagship_Before          | na   | USA               | na        | L1 |
| EF532808 | FF3_Before               | na   | USA               | na        | L1 |
| EF532809 | FF4_After                | na   | USA               | na        | L1 |
| EF532813 | Hawkeye4_Before          | na   | USA               | na        | L1 |
| EF532816 | ISU-P                    | na   | USA               | na        | L5 |
| EF536000 | MN30100                  | na   | USA               | Minnesota | L9 |
| EF536001 | QUAL1_Before             | na   | USA               | na        | L5 |
| EF536002 | QUAL2_After              | na   | USA               | na        | L1 |
| HQ699067 | NC16845                  | 2006 | USA               | na        | L9 |
| JN654458 | SDSU73                   | 1996 | USA               | na        | L8 |
| JN654459 | NADC30                   | 2008 | USA               | Iwoa      | L1 |
| JN660150 | NADC31                   | 2008 | USA               | Iwoa      | L1 |
| JQ087873 | A2MC2                    | 2010 | USA               | na        | L5 |
| JX044140 | VR2385                   | na   | USA               | na        | L5 |
| JX258843 | SD23983                  | na   | USA               | na        | L5 |
| KC469618 | SD95-21                  | 1995 | USA               | na        | L5 |
| KF632717 | XW001                    | 2012 | USA               | na        | L1 |
| KF724397 | XW004                    | 2011 | USA               | na        | L1 |

---



|          |              |      |     |           |       |
|----------|--------------|------|-----|-----------|-------|
| KF724399 | XW011        | 2012 | USA | na        | L9    |
| KF724403 | XW007        | 2012 | USA | na        | L9    |
| KF724404 | XW008        | 2012 | USA | na        | L2/L8 |
| KF724406 | XW014        | 2011 | USA | na        | L9    |
| KF724407 | XW019        | 2013 | USA | na        | L6    |
| KF724408 | XW018        | 2013 | USA | na        | L1    |
| KF724409 | XW015        | 2013 | USA | na        | L1    |
| KF724410 | XW016        | 2013 | USA | na        | L1    |
| KF724411 | XW017        | 2013 | USA | na        | L1    |
| KF724412 | XW006        | 2013 | USA | na        | L1    |
| KF724413 | XW002        | 2013 | USA | na        | L5    |
| KP283399 | MN11B        | 2012 | USA | Minnesota | L1    |
| KP283400 | MN9B         | 2012 | USA | Minnesota | L1    |
| KP283401 | MN6          | 2012 | USA | Minnesota | L1    |
| KP283402 | Minnesota17B | 2013 | USA | Minnesota | L1    |
| KP283403 | Minnesota17A | 2012 | USA | Minnesota | L1    |
| KP283404 | Minnesota16  | 2011 | USA | Minnesota | L1    |
| KP283405 | Minnesota15  | 2012 | USA | Minnesota | L1    |
| KP283406 | Minnesota14  | 2012 | USA | Minnesota | L1    |
| KP283407 | Minnesota11A | 2012 | USA | Minnesota | L1    |
| KP283408 | Minnesota9A  | 2012 | USA | Minnesota | L1    |
| KP283409 | Minnesota7   | 2012 | USA | Minnesota | L1    |
| KP283410 | Minnesota5   | 2012 | USA | Minnesota | L1    |
| KP283411 | Minnesota4   | 2012 | USA | Minnesota | L1    |
| KP283412 | Minnesota3   | 2012 | USA | Minnesota | L1    |
| KP283413 | Minnesota2   | 2012 | USA | Minnesota | L1    |
| KP283414 | Minnesota1   | 2012 | USA | Minnesota | L1    |
| KP283415 | Iowa12       | 2012 | USA | Iowa      | L1    |
| KP283416 | Illinois8    | 2012 | USA | Illinois  | L1    |
| KR534893 | OH28372-2013 | 2013 | USA | Ohio      | L1    |
| KR534894 | OH155-2015   | 2015 | USA | Ohio      | L1    |
| KT207837 | 12-39404     | 2012 | USA | na        | L9    |
| KT257944 | 14-60        | 2014 | USA | Iowa      | L5    |
| KT257945 | 14-64        | 2014 | USA | Iowa      | L5    |
| KT257946 | 14-67        | 2014 | USA | Iowa      | L5    |
| KT257947 | 14-68        | 2014 | USA | Iowa      | L5    |
| KT257948 | 14-76        | 2014 | USA | Minnesota | L8    |
| KT257950 | 14-79        | 2014 | USA | Minnesota | L8    |
| KT257952 | 14-95        | 2014 | USA | Minnesota | L8    |
| KT257953 | 14-96        | 2014 | USA | Minnesota | L8    |
| KT257954 | 21675        | 2014 | USA | Kansas    | L1    |
| KT257955 | 101416       | 2014 | USA | Colorado  | L1    |
| KT257956 | 103837       | 2014 | USA | Kansas    | L1    |

---

|          |        |      |     |                   |    |
|----------|--------|------|-----|-------------------|----|
| KT257958 | 109560 | 2014 | USA | Kansas            | L1 |
| KT257959 | ISU01  | 2014 | USA | na                | L1 |
| KT257962 | ISU04  | 2014 | USA | na                | L1 |
| KT257963 | ISU05  | 2014 | USA | na                | L1 |
| KT257964 | ISU06  | 2014 | USA | na                | L1 |
| KT257965 | ISU07  | 2014 | USA | na                | L1 |
| KT257966 | ISU10  | 2014 | USA | North<br>Carolina | L1 |
| KT257967 | ISU17  | 2014 | USA | Iowa              | L1 |
| KT257968 | ISU18  | 2014 | USA | Iowa              | L1 |
| KT257970 | ISU22  | 2014 | USA | na                | L1 |
| KT257971 | ISU23  | 2014 | USA | na                | L1 |
| KT257972 | ISU24  | 2014 | USA | na                | L1 |
| KT257973 | ISU25  | 2014 | USA | na                | L1 |
| KT257974 | ISU27  | 2014 | USA | na                | L1 |
| KT257975 | ISU28  | 2014 | USA | na                | L1 |
| KT257976 | ISU29  | 2014 | USA | na                | L1 |
| KT257977 | ISU30  | 2014 | USA | na                | L1 |
| KT257978 | ISU32  | 2014 | USA | na                | L1 |
| KT257980 | ISU37  | 2014 | USA | na                | L1 |
| KT257981 | ISU39  | 2014 | USA | na                | L1 |
| KT257982 | ISU40  | 2014 | USA | na                | L1 |
| KT257983 | ISU47  | 2014 | USA | Iowa              | L1 |
| KT257984 | ISU49  | 2014 | USA | na                | L1 |
| KT257986 | ISU67  | 2014 | USA | na                | L1 |
| KT257987 | ISU68  | 2014 | USA | Iowa              | L1 |
| KT257990 | ISU71  | 2014 | USA | na                | L1 |
| KT257991 | ISU72  | 2014 | USA | na                | L1 |
| KT257992 | ISU73  | 2014 | USA | Missouri          | L1 |
| KT257993 | ISU78  | 2014 | USA | Iowa              | L1 |
| KT257994 | ISU81  | 2014 | USA | Nebraska          | L1 |
| KT257995 | ISU82  | 2014 | USA | Nebraska          | L1 |
| KT257996 | ISU84  | 2014 | USA | Nebraska          | L1 |
| KT257997 | ISU86  | 2014 | USA | Nebraska          | L1 |
| KT257998 | ISU87  | 2014 | USA | Nebraska          | L1 |
| KT257999 | ISU90  | 2014 | USA | Colorado          | L1 |
| KT258000 | ISU91  | 2014 | USA | Colorado          | L1 |
| KT258001 | ISU94  | 2014 | USA | Iowa              | L1 |
| KT258002 | ISU96  | 2014 | USA | Iowa              | L1 |
| KT258003 | ISU97  | 2014 | USA | Iowa              | L1 |
| KT258004 | ISU95  | 2014 | USA | Iowa              | L1 |
| KT258006 | SDSU58 | 2014 | USA | North<br>Carolina | L1 |

---

|          |                            |      |     |                   |    |
|----------|----------------------------|------|-----|-------------------|----|
| KT258007 | SDSU62                     | 2014 | USA | Nebraska          | L1 |
| KT258009 | SDSU47                     | 2014 | USA | Iowa              | L1 |
| KT581982 | MN414                      | 2014 | USA | Minnesota         | L1 |
| KX192112 | NCV-13                     | 2016 | USA | Nebraska          | L1 |
| KX192113 | NCV-16                     | 2016 | USA | Nebraska          | L1 |
| KX192114 | NCV-17                     | 2016 | USA | Nebraska          | L1 |
| KX192115 | NCV-21                     | 2016 | USA | Nebraska          | L1 |
| KX192116 | NCV-23                     | 2016 | USA | Nebraska          | L1 |
| KX192117 | NCV-24                     | 2016 | USA | Nebraska          | L1 |
| KX192118 | NCV-25                     | 2016 | USA | Nebraska          | L1 |
| KX192119 | NCV-26                     | 2016 | USA | Nebraska          | L1 |
| KX462792 | A2MC2                      | 2012 | USA | na                | L5 |
| KY348847 | 1692-98                    | 1998 | USA | na                | L9 |
| KY348848 | 18066-04                   | 2004 | USA | na                | L1 |
| KY348849 | 18565-01                   | 2001 | USA | na                | L1 |
| KY348850 | 21599-00                   | 2000 | USA | na                | L9 |
| KY348851 | 43807-00                   | 2000 | USA | na                | L5 |
| KY348852 | 46517-00                   | 2000 | USA | na                | L9 |
| KY348853 | 3805-00                    | 2000 | USA | na                | L5 |
| MF326985 | IA/2014/NADC34             | 2014 | USA | Iowa              | L1 |
| MF326986 | IA/2015/NADC35             | 2015 | USA | Iowa              | L1 |
| MF326987 | IA/2015/NADC36             | 2015 | USA | Iowa              | L1 |
| MF326988 | IA/2013/ISU-1              | 2013 | USA | Iowa              | L1 |
| MF326989 | IA/2014/ISU-2              | 2014 | USA | Iowa              | L1 |
| MF326990 | NC/2014/ISU-3              | 2014 | USA | North<br>Carolina | L1 |
| MF326991 | NC/2014/ISU-4              | 2014 | USA | North<br>Carolina | L1 |
| MF326992 | IN/2014/ISU-5              | 2014 | USA | Indiana           | L1 |
| MF326993 | OH/2014/ISU-6              | 2014 | USA | Ohio              | L1 |
| MF326994 | OH/2014/ISU-7              | 2014 | USA | Ohio              | L1 |
| MF326995 | IA/2014/ISU-8              | 2014 | USA | Iowa              | L1 |
| MF326996 | IA/2015/ISU-9              | 2015 | USA | Iowa              | L1 |
| MF326997 | IA/2015/ISU-10             | 2015 | USA | Iowa              | L1 |
| MF326998 | NC/2015/ISU-11             | 2015 | USA | North<br>Carolina | L1 |
| MF326999 | NC/2015/ISU-12             | 2015 | USA | North<br>Carolina | L1 |
| MF327000 | IA/2015/ISU-13             | 2015 | USA | Iowa              | L1 |
| MF327001 | IA/2015/ISU-14             | 2015 | USA | Iowa              | L1 |
| MF526964 | USA/IN_Purdue/1490-LN/2017 | 2017 | USA | Indiana           | L1 |
| MF526965 | USA/IN_Purdue/14067/2017   | 2017 | USA | Indiana           | L1 |
| MF663706 | IA14737-2016               | 2016 | USA | na                | L1 |

|          |                      |      |     |                   |    |
|----------|----------------------|------|-----|-------------------|----|
| MK680895 | USA/OklahomaSHM/2016 | 2016 | USA | na                | L1 |
| MK796164 | IA76950-WT           | 2018 | USA | na                | L1 |
| MK796165 | IA70388-R            | 2018 | USA | na                | L8 |
| MK820651 | P129                 | 1995 | USA | Indiana           | L6 |
| MK837936 | NADC20               | 1996 | USA | na                | L9 |
| MK860181 | 394-1                | 2015 | USA | North<br>Carolina | L1 |
| MN073081 | 0752R-S4             | 2018 | USA | na                | L1 |
| MN073082 | 7710R-S18            | 2018 | USA | na                | L1 |
| MN073083 | 7498R-S10            | 2018 | USA | na                | L1 |
| MN073084 | 2385R-S13            | 2018 | USA | na                | L1 |
| MN073085 | 018560PRRS-S9-L001   | na   | USA | na                | L1 |
| MN073086 | 1924R-S2-L001        | 2017 | USA | na                | L1 |
| MN073087 | 018561PRRS-S10-L001  | na   | USA | na                | L1 |
| MN073088 | 1923R-S1-L001        | 2017 | USA | na                | L1 |
| MN073089 | 9337R-S4-L001        | 2017 | USA | na                | L1 |
| MN073090 | PRR223341-S23-L001   | na   | USA | na                | L1 |
| MN073091 | PRR223343-S24-L001   | na   | USA | na                | L1 |
| MN073092 | 9982R-S5-L001        | 2017 | USA | na                | L1 |
| MN073093 | PRR21032-S1-L001     | na   | USA | na                | L1 |
| MN073094 | brian27950-S16-L001  | na   | USA | na                | L1 |
| MN073095 | 20170210381-S2-L001  | 2017 | USA | na                | L1 |
| MN073096 | PRRSV-2018014208-S12 | 2018 | USA | na                | L1 |
| MN073097 | 5606R-S6-L001        | 2017 | USA | na                | L1 |
| MN073098 | PRR312824-S16-L001   | 2017 | USA | na                | L1 |
| MN073099 | PRR312825-S17-L001   | 2017 | USA | na                | L1 |
| MN073100 | PRR312826-S18-L001   | 2017 | USA | na                | L1 |
| MN073101 | PRRSV-2018014209-S1  | 2018 | USA | na                | L1 |
| MN073102 | 7705R-S1             | 2018 | USA | na                | L1 |
| MN073103 | 014737Fib-S5-L001    | na   | USA | na                | L1 |
| MN073104 | 014737lu1A-S1-L001   | na   | USA | na                | L1 |
| MN073105 | 014737lu2A-S2-L001   | na   | USA | na                | L1 |
| MN073106 | 014737luC-S4-L001    | na   | USA | na                | L1 |
| MN073107 | 014737Ton-S6-L001    | na   | USA | na                | L1 |
| MN073108 | 014737luB-S3-L001    | na   | USA | na                | L1 |
| MN073109 | br42321BC-S13-L001   | na   | USA | na                | L1 |
| MN073110 | PRR41505-S4-L001     | na   | USA | na                | L1 |
| MN073111 | PRR027983-S27-L001   | 2017 | USA | na                | L1 |
| MN073112 | PRR027984-S28-L001   | 2017 | USA | na                | L1 |
| MN073113 | PRR312823-S15-L001   | 2017 | USA | na                | L1 |
| MN073114 | 52335PRRS-S10-L001   | 2016 | USA | na                | L1 |
| MN073115 | 5988810PRRS-S5-L001  | 2016 | USA | na                | L1 |
| MN073116 | 27981kf-S3-L001      | 2017 | USA | na                | L1 |

---

|          |                       |      |     |    |    |
|----------|-----------------------|------|-----|----|----|
| MN073117 | PRR027982-S26-L001    | 2017 | USA | na | L1 |
| MN073118 | PRR027981-S25-L001    | 2017 | USA | na | L1 |
| MN073119 | 5381R-S5-L001         | 2017 | USA | na | L1 |
| MN073120 | 5383R-S7-L001         | 2017 | USA | na | L1 |
| MN073121 | 5382R-S6-L001         | 2017 | USA | na | L1 |
| MN073122 | 6950-1R-S2            | 2018 | USA | na | L1 |
| MN073123 | PRR312821-S13-L001    | 2017 | USA | na | L1 |
| MN073124 | PRR312822-S14-L001    | 2017 | USA | na | L1 |
| MN073125 | PRR312827-S19-L001    | na   | USA | na | L1 |
| MN073126 | 016789PRR1-S11-L001   | na   | USA | na | L1 |
| MN073127 | 7684R-S11             | 2018 | USA | na | L1 |
| MN073128 | PRRSV-201704176-1-S16 | na   | USA | na | L7 |
| MN073129 | 41761R-S15-L001       | 2018 | USA | na | L7 |
| MN073130 | 4115R-S1              | 2018 | USA | na | L5 |
| MN073131 | 1041R-S1              | 2018 | USA | na | L5 |
| MN073132 | 4512R-S7-L001         | 2018 | USA | na | L5 |
| MN073133 | 7473PRRS-S3-L001      | 2016 | USA | na | L5 |
| MN073134 | PRR715665-S8-L001     | na   | USA | na | L5 |
| MN073135 | PRR715666-S9-L001     | na   | USA | na | L5 |
| MN073136 | 397081R-S16-L001      | 2017 | USA | na | L5 |
| MN073137 | 397082R-S17-L001      | 2017 | USA | na | L5 |
| MN073138 | 7472PRRS-S2-L001      | 2016 | USA | na | L5 |
| MN073139 | 7471PRRS-S1-L001      | 2016 | USA | na | L5 |
| MN073140 | lung23199-S4-L001     | 2017 | USA | na | L5 |
| MN073141 | PRR1467916R-S6-L001   | 2017 | USA | na | L5 |
| MN073142 | PRR146795R-S5-L001    | 2017 | USA | na | L5 |
| MN073143 | PRR146795SA-S1-L001   | 2017 | USA | na | L5 |
| MN073144 | PRR146795SQ-S3-L001   | 2017 | USA | na | L5 |
| MN073145 | PRR1467916SA-S2-L001  | 2017 | USA | na | L5 |
| MN073146 | PRR1467916SQ-S4-L001  | 2017 | USA | na | L5 |
| MN073147 | PRRS35752R-S7-L001    | 2017 | USA | na | L5 |
| MN073148 | PRR02760-S1-L001      | 2017 | USA | na | L5 |
| MN073149 | PRR02760Q-S15-L001    | 2017 | USA | na | L5 |
| MN073150 | lng26861I-S17-L001    | 2017 | USA | na | L5 |
| MN073152 | PRR71566-4-S10        | na   | USA | na | L8 |
| MN073153 | PRR715664-S10-L001    | na   | USA | na | L8 |
| MN073154 | PRR715667-S11-L001    | na   | USA | na | L8 |
| MN073155 | PRR3-S3-L001          | 2016 | USA | na | L8 |
| MN073156 | PRRSV-2017083451-S10  | na   | USA | na | L8 |
| MN073157 | 3451R-S10-L001        | 2018 | USA | na | L8 |
| MN073158 | 2017021039-S12-L001   | 2017 | USA | na | L8 |
| MN073159 | lung249621-S5-L001    | 2017 | USA | na | L8 |
| MN073160 | lung249622-S6-L001    | 2017 | USA | na | L8 |

---

---

|           |                     |      |      |    |    |
|-----------|---------------------|------|------|----|----|
| MN073161  | 9985R-S8-L001       | 2017 | USA  | na | L8 |
| MN073162  | 9981R-S4-L001       | 2017 | USA  | na | L8 |
| MN073163  | PRR40074-S3-L001    | na   | USA  | na | L8 |
| MN073164  | serum24962-S7-L001  | 2017 | USA  | na | L8 |
| MN073165  | 9983R-S6-L001       | 2017 | USA  | na | L8 |
| MN073166  | PRR80785GJ-S21-L001 | na   | USA  | na | L8 |
| MN073167  | PRR80785GD-S22-L001 | na   | USA  | na | L8 |
| MN073168  | 562482PRRS-S4-L001  | 2016 | USA  | na | L8 |
| MN073169  | 6660R-S5-L001       | 2017 | USA  | na | L8 |
| MN073170  | 9986R-S9-L001       | 2017 | USA  | na | L8 |
| MN073171  | 9987R-S10-L001      | 2017 | USA  | na | L8 |
| MN073172  | 1504R-S1            | 2018 | USA  | na | L1 |
| MN073173  | 8812-3R-S15         | 2018 | USA  | na | L1 |
| MN073174  | PRRSV-2018017613-S8 | 2018 | USA  | na | L1 |
| MN073175  | 012574PRR-S1-L001   | na   | USA  | na | L1 |
| MN073176  | 012574VI-S2-L001    | na   | USA  | na | L1 |
| MN073177  | 191R-S18-L001       | 2017 | USA  | na | L1 |
| MN073178  | 192R-S19-L001       | 2017 | USA  | na | L1 |
| MN073179  | PRRSVlung-S1-L001   | 2016 | USA  | na | L1 |
| MN073180  | 7703R-S6            | 2018 | USA  | na | L1 |
| MN073181  | PRR80785            | na   | USA  | na | L8 |
| MN073182  | PRR22334-1          | na   | USA  | na | L1 |
| MN175677  | PRRSV2/USA/Lab3     | 2016 | USA  | na | L1 |
| NC_001961 | NC_001961           | na   | USA  | na | L5 |
| U87392    | ATCC VR-2332        | 1992 | USA  | na | L5 |
| FJ394029  | 07QN                | 2007 | Viet | na | L8 |
|           |                     |      | Nam  |    |    |
| JX512910  | SRV07               | 2007 | Viet | na | L8 |
|           |                     |      | Nam  |    |    |
| KU842720  | Hanvet1.vn          | 2010 | Viet | na | L8 |
|           |                     |      | Nam  |    |    |

---

Supplementary Table 2. Reference strains information used in this study.

| Accession number | Strain          | Date | Country | Province/<br>States | Lineage |
|------------------|-----------------|------|---------|---------------------|---------|
| AB023782         | Kitasato 93-1   | na   | Japan   | na                  | L4      |
| AB175696         | Jiw1            | na   | Japan   | Iwate               | L4      |
| AB175708         | Jtg1            | na   | Japan   | Tochigi             | L4      |
| AB175716         | Aomori 93       | na   | Japan   | Aomori              | L4      |
| AB175717         | Chiba 14        | na   | Japan   | Chiba               | L4      |
| AB175720         | EDRD-8          | na   | Japan   | Hokkaido            | L4      |
| AB175721         | Gu922M          | na   | Japan   | Gunma               | L4      |
| AB175722         | Ibaraki 3       | na   | Japan   | Ibaraki             | L4      |
| AB175712         | Jyt1            | na   | Japan   | Yamagata            | L4      |
| AB175714         | Jyt3            | na   | Japan   | Yamagata            | L4      |
| AF176462         | PRRSV40         | na   | USA     | Illinois            | L9      |
| DQ475064         | PRRSV0000386    | 2004 | na      | na                  | L9      |
| DQ476027         | PRRSV0001584    | 2003 | USA     | Nebraska            | L9      |
| DQ476294         | PRRSV0001940    | 2003 | USA     | Texas               | L9      |
| DQ476464         | PRRSV0002160    | 2003 | USA     | North Carolina      | L9      |
| DQ477194         | PRRSV0003049    | 2004 | USA     | Texas               | L9      |
| DQ477476         | PRRSV0003401    | na   | na      | na                  | L9      |
| EU556160         | 2000-5424       | na   | na      | na                  | L9      |
| EU756048         | PRRSV0000004469 | 2005 | USA     | Minnesota           | L9      |
| EU756993         | PRRSV0000006345 | 2001 | USA     | Iowa                | L9      |
| EU757947         | PRRSV0000007649 | 2005 | USA     | Iowa                | L9      |
| EU758266         | PRRSV0000008140 | 2005 | USA     | Iowa                | L9      |
| JX014352         | XJNJ-2-2        | 2011 | China   | Xinjiang            | L9      |
| JX014359         | XJNJ-17-2       | 2011 | China   | Xinjiang            | L9      |

Supplementary Table3. Recombination information of PRRSVs in 2019-2021.

| Accession number | Strain name  | Country | Major parent | Minor parent | Region 1 |       |        | Region 2 |       |        | Region 3 |       |        | Region 4 |       |        |
|------------------|--------------|---------|--------------|--------------|----------|-------|--------|----------|-------|--------|----------|-------|--------|----------|-------|--------|
|                  |              |         |              |              | Left     | Right | Length | Left     | Right | Length | Left     | Right | Length | Left     | Right | Length |
| MK429986         | SWU/CD1/2018 | China   | L1           | L5           | 7871     | 8111  | 240    | 12849    | 13296 | 447    |          |       |        |          |       |        |
| MK429985         | SWU/YB2/2018 | China   | L1           | L5           | 7931     | 8126  | 195    | 12847    | 13311 | 464    |          |       |        |          |       |        |
| MK429984         | SWU/YB1/2018 | China   | L1           | L5           | 7871     | 8111  | 240    | 12849    | 13301 | 452    |          |       |        |          |       |        |
| MK429983         | SWU/MY6/2018 | China   | L1           | L5           | 7890     | 8109  | 219    | 12840    | 13301 | 461    |          |       |        |          |       |        |
| MK429982         | SWU/MY5/2018 | China   | L1           | L5           | 7890     | 8109  | 219    | 12840    | 13301 | 461    |          |       |        |          |       |        |
| MK429981         | SWU/MS3/2018 | China   | L1           | L5           | 7871     | 8111  | 240    | 12829    | 13315 | 486    |          |       |        |          |       |        |
| MK429980         | SWU/MS2/2018 | China   | L1           | L5           | 7911     | 8111  | 200    | 12847    | 13301 | 454    |          |       |        |          |       |        |
| MK144543         | SCya18       | China   | L1           | L8           | 1        | 1685  | 1684   | 11093    | 11600 | 507    | 12001    | 12270 | 269    | 12468    | 14171 | 1703   |
| MH588710         | SDbz16-2     | China   | L1           | L8           | 5414     | 6949  | 1535   |          |       |        |          |       |        |          |       |        |
| MF766472         | HeN1501      | China   | L8           | L5           | 12525    | 12875 | 350    |          |       |        |          |       |        |          |       |        |
| MN606304         | JS18-3       | China   | L8           | L1           | 1799     | 5019  | 3220   |          |       |        |          |       |        |          |       |        |
| MN660070         | GXNN1839     | China   | L1           | L5           | 7911     | 8113  | 202    | 12844    | 13300 | 456    |          |       |        |          |       |        |
| MN660067         | GXNN1396-p3  | China   | L8           | L9           | 12916    | 13141 | 225    |          |       |        |          |       |        |          |       |        |
| MK780825         | SD110-1608   | China   | L8           | L3           | 3889     | 6738  | 2849   | 11329    | 13067 | 1738   | 13792    | 15211 | 1419   |          |       |        |
| MK396384         | GDsf1809     | China   | L1           | L5           | 7842     | 8111  | 269    | 12890    | 13277 | 387    |          |       |        |          |       |        |
| MK396383         | GDsf1808     | China   | L1           | L5           | 7836     | 8117  | 281    | 12890    | 13285 | 395    |          |       |        |          |       |        |
| MK396382         | GDsf1807     | China   | L1           | L5           | 7835     | 8129  | 294    | 12898    | 13296 | 398    |          |       |        |          |       |        |
| MK396381         | GDsf1806     | China   | L1           | L5           | 7842     | 8117  | 275    | 12890    | 13285 | 395    |          |       |        |          |       |        |
| MK396380         | GDsf1804     | China   | L1           | L5           | 7842     | 8117  | 275    |          |       |        |          |       |        |          |       |        |
| MK396379         | GDsf1802     | China   | L1           | L8           | 6960     | 7441  | 481    | 7871     | 8752  | 881    |          |       |        |          |       |        |
| MK396378         | GDsf1711     | China   | L1           | L8           | 6954     | 7437  | 483    | 7851     | 8752  | 901    |          |       |        |          |       |        |
| MK396377         | GDsf1710     | China   | L1           | L8           | 6954     | 7437  | 483    | 7871     | 8752  | 881    |          |       |        |          |       |        |
| MK396376         | GDsf1707     | China   | L1           | L8           | 6954     | 7437  | 483    | 7871     | 8752  | 881    |          |       |        |          |       |        |
|                  | HB94-lun     | China   | L1           | L8           | 5496     | 8132  | 2636   |          |       |        |          |       |        |          |       |        |
|                  | S145         | China   | L1           | L5           | 7971     | 8104  | 133    |          |       |        |          |       |        |          |       |        |
|                  | S130-lym     | China   | L1           | L5           | 7874     | 8104  | 230    |          |       |        |          |       |        |          |       |        |
|                  | C101-lun     | China   | L8           | L5           | 12451    | 12634 | 183    | 12901    | 15898 | 2997   |          |       |        |          |       |        |
|                  | S039         | China   | L8           | L1           | 1814     | 5772  | 3958   | 13827    | 14984 | 1157   |          |       |        |          |       |        |
|                  | H60-lun      | China   | L1           | L8           | 1        | 2030  | 2029   | 5415     | 8173  | 2758   |          |       |        |          |       |        |



|          |                                   |       |    |    |       |       |      |       |       |      |       |       |      |      |       |      |
|----------|-----------------------------------|-------|----|----|-------|-------|------|-------|-------|------|-------|-------|------|------|-------|------|
|          | NA80-lun                          | China | L5 | L8 | 1235  | 1495  | 260  | 2266  | 4401  | 2135 | 5809  | 6687  | 878  | 9093 | 12534 | 3441 |
|          | LN86-lun                          | China | L1 | L5 | 11088 | 11661 | 573  |       |       |      |       |       |      |      |       |      |
|          | H013                              | China | L1 | L8 | 5901  | 6201  | 300  | 7122  | 8121  | 999  |       |       |      |      |       |      |
|          | S043                              | China | L1 | L8 | 1     | 1551  | 1550 | 5402  | 8151  | 2749 |       |       |      |      |       |      |
|          | S136-lun                          | China | L1 | L8 | 5940  | 6317  | 377  | 6761  | 8118  | 1357 |       |       |      |      |       |      |
|          | H012                              | China | L1 | L8 | 1     | 2025  | 2024 | 5504  | 9168  | 3664 | 14011 | 14251 | 240  |      |       |      |
|          | S001-lun                          | China | L1 | L5 | 7871  | 8116  | 245  | 12824 | 13308 | 484  |       |       |      |      |       |      |
| MF526896 | GDQYQC2                           | China | L8 | L3 | 11328 | 13843 | 2515 | 14568 | 15081 | 513  |       |       |      |      |       |      |
| MN119308 | JS1810-195                        | China | L8 | L6 | 4301  | 4451  | 150  | 5361  | 5560  | 199  | 12071 | 13041 | 970  |      |       |      |
| MN119309 | XJ1904-39                         | China | L8 | L1 | 2122  | 5756  | 3634 | 12281 | 15012 | 2731 |       |       |      |      |       |      |
| MN642099 | SDqd1501                          | China | L8 | L3 | 3899  | 6760  | 2861 | 11336 | 13105 | 1769 | 13827 | 15172 | 1345 |      |       |      |
| MN642102 | SDwh1601                          | China | L8 | L1 | 12344 | 12547 | 203  | 12836 | 15315 | 2479 |       |       |      |      |       |      |
| MN642105 | SDyt1401                          | China | L8 | L1 | 12312 | 12521 | 209  | 12820 | 15315 | 2495 |       |       |      |      |       |      |
| MT394494 | GDhh1808                          | China | L8 | L1 | 1569  | 5415  | 3846 | 12317 | 13866 | 1549 | 14319 | 15046 | 727  |      |       |      |
| MT416541 | PRRSV2/CN/X2984/2018              | China | L8 | L5 | 8910  | 9590  | 680  | 13148 | 13357 | 209  |       |       |      |      |       |      |
| MT416542 | PRRSV2/CN/N9185/2018              | China | L8 | L1 | 12021 | 14033 | 2012 | 14191 | 14600 | 409  |       |       |      |      |       |      |
| MT416543 | PRRSV2/CN/F1228/2017              | China | L8 | L5 | 1972  | 2189  | 217  |       |       |      |       |       |      |      |       |      |
| MT708500 | SD-YL1712                         | China | L8 | L1 | 2145  | 4072  | 1927 |       |       |      |       |       |      |      |       |      |
| MT721741 | PRRSV2/CN/GDDX/2018               | China | L8 | L5 | 8770  | 9590  | 820  | 13148 | 13357 | 209  |       |       |      |      |       |      |
| MZ579701 | HBap4/2018                        | China | L8 | L1 | 2030  | 5673  | 3643 | 6857  | 7921  | 1064 | 14848 | 15028 | 180  |      |       |      |
| MH651745 | SD99-1606                         | China | L1 | L5 | 7881  | 8121  | 240  |       |       |      |       |       |      |      |       |      |
| MN119305 | SD1704-23                         | China | L1 | L8 | 6798  | 7416  | 618  | 12880 | 13253 | 373  |       |       |      |      |       |      |
| MN119307 | HN1804-2                          | China | L1 | L8 | 5522  | 8141  | 2619 |       |       |      |       |       |      |      |       |      |
| MN642101 | SDwh1403                          | China | L1 | L5 | 7881  | 8127  | 246  | 12851 | 13331 | 480  |       |       |      |      |       |      |
| MN862433 | FJDJQ-2018                        | China | L1 | L8 | 1     | 1294  | 1293 | 4236  | 6394  | 2158 | 7259  | 9668  | 2409 |      |       |      |
| MT036897 | FS-GD-02_FoShan_Guangdong_2016.01 | China | L1 | L8 | 6775  | 9794  | 3019 | 11081 | 11345 | 264  |       |       |      |      |       |      |
| MT036898 | GDHZ_Huizhou                      | China | L1 | L8 | 11348 | 11701 | 353  |       |       |      |       |       |      |      |       |      |
| MT036899 | HZ1-3_Yunnan_20171                | China | L1 | L8 | 429   | 683   | 254  |       |       |      |       |       |      |      |       |      |
| MT075480 | SC/DJY                            | China | L1 | L8 | 7868  | 8944  | 1076 | 11095 | 11561 | 466  | 11864 | 12343 | 479  |      |       |      |
| MT165636 | GD1909                            | China | L1 | L8 | 1     | 1303  | 1302 | 4395  | 5984  | 1589 | 7821  | 8134  | 313  |      |       |      |
| MT394496 | GDsc1808                          | China | L1 | L5 | 7842  | 8121  | 279  | 12890 | 13285 | 395  |       |       |      |      |       |      |
| MT394497 | GDsc1809                          | China | L1 | L5 | 7842  | 8117  | 275  | 12893 | 13285 | 392  |       |       |      |      |       |      |
| MT409687 | PRRSV2/CN/X4831/2018              | China | L1 | L8 | 6933  | 7451  | 518  | 7868  | 8251  | 383  |       |       |      |      |       |      |
| MT409688 | PRRSV2/CN/X9830/2018              | China | L1 | L8 | 185   | 701   | 516  | 12788 | 13418 | 630  | 14241 | 14396 | 155  |      |       |      |

---

|          |                           |       |    |    |      |      |      |       |       |      |       |       |     |       |       |     |
|----------|---------------------------|-------|----|----|------|------|------|-------|-------|------|-------|-------|-----|-------|-------|-----|
| MT409689 | PRRSV2/CN/X4836/2018      | China | L1 | L8 | 6888 | 9516 | 2628 | 12486 | 12914 | 428  | 13113 | 13471 | 358 |       |       |     |
| MT409691 | PRRSV2/CN/X4833/2018      | China | L1 | L8 | 1    | 1046 | 1045 | 12850 | 13007 | 157  | 13189 | 13418 | 229 |       |       |     |
| MT409692 | PRRSV2/CN/X4839/2017      | China | L1 | L8 | 4855 | 5121 | 266  |       |       |      |       |       |     |       |       |     |
| MT416546 | PRRSV2/CN/110713/2018     | China | L1 | L8 | 431  | 716  | 285  | 6945  | 7366  | 421  | 8291  | 8497  | 206 |       |       |     |
| MW531679 | GXNN202004a               | China | L1 | L8 | 1    | 446  | 445  | 5721  | 6902  | 1181 |       |       |     |       |       |     |
| MW561594 | GXNN202004                | China | L1 | L8 | 1    | 2024 | 2023 | 5812  | 8964  | 3152 | 11356 | 11561 | 205 |       |       |     |
| MW803134 | PRRSV-China/SCcd2020/2020 | China | L1 | L8 | 4085 | 4594 | 509  | 5438  | 8149  | 2711 | 8774  | 8957  | 183 | 12661 | 13229 | 568 |
| MZ342900 | JS2020                    | China | L1 | L8 | 5445 | 8239 | 2794 | 12728 | 13000 | 272  | 14323 | 14525 | 202 |       |       |     |

---

Supplementary Table 4. Primers used to construct the HuN4 and HeB108 recombinant viruses.

| Primer name        | Primer Sequence (5'-3')                  |
|--------------------|------------------------------------------|
| HeB- <i>Nhe</i> -F | AGGAACAGTGTTTAAACTGCTAGCCGCCAGCGGCTTGAC  |
| HeB- <i>Nhe</i> -R | GTCAAGCCGCTGGCGGCTAGCAGTTTAAACACTGTTTCCT |
| HeB-HuN-F          | CTCAGGTCCAATCATGAGGGGAAGAAGTCCAGGGTG     |
| HeB-HuN-R          | CACCCTGGACTTCTTCCCCTCATGATTGGACCTGAG     |
| HeB-HuNp-F         | GCTGTGCGAGAAAACACTGGCAGACTGTTACCCCTTGC   |
| HeB- HuNp-R        | GCAAGGGGTAACAGTCTGCCAGTTTTCTCGCACAGC     |
| HuN-HeB-F          | CTCAGGTCCAATTATGAAGGGGAAGAAGTCCAGAATG    |
| HuN-HeB-R          | CATTCTGGACTTCTTCCCCTCATAATTGGACCTGAG     |
| HuN- <i>Nhe</i> -F | AGGAGCAGTGTTTAAACTGCTAGCCGCCAGCGGCTTG    |
| HeB- <i>Asc</i> -R | TTTCCCTTTCTGGCGCGCCCGAAACGCATCATTGTAAT   |
| HuN-HeBp-F         | GCTGTGCGAGAAAACACTGGCAAACACTGTTACCCCTTGT |
| HuN-HeBp-R         | ACAAGGGGTAACAGTTTGCCAGTTTTCTCGCACAGC     |
